# Supplementary material
Source: ML conference proceedings conference paper supplement (https://openreview.net/forum?id=iPFlJESrsh)
Supplement: supplementary_material [file pred_transfer.pdf › filter/notebooks/figures/pred_transfer.pdf]

Cached From

SelectOne (79)  
SelectOne-MCQ (45)  
SelectFirst (81)  
SelectLast (145)  
Counting (64)  
Yes/No (21)

SelectOne  
SelectOne-MCQ  
SelectFirst  
SelectLast  
Counting  
Yes/No

Patched To

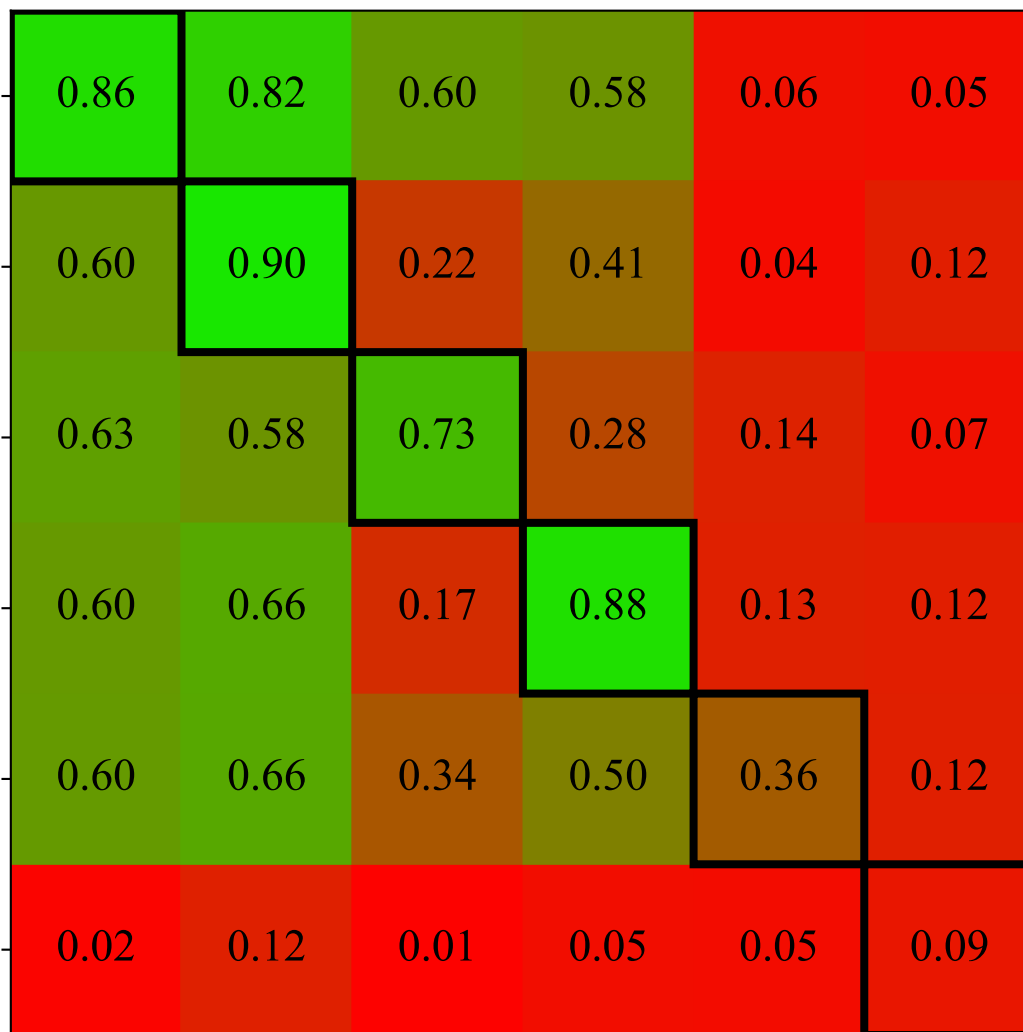

Causality Value

1.0  
0.8  
0.6  
0.4  
0.2  
0.0
