# Supplementary material
Source: ML conference proceedings conference paper supplement (https://openreview.net/forum?id=iPFlJESrsh)

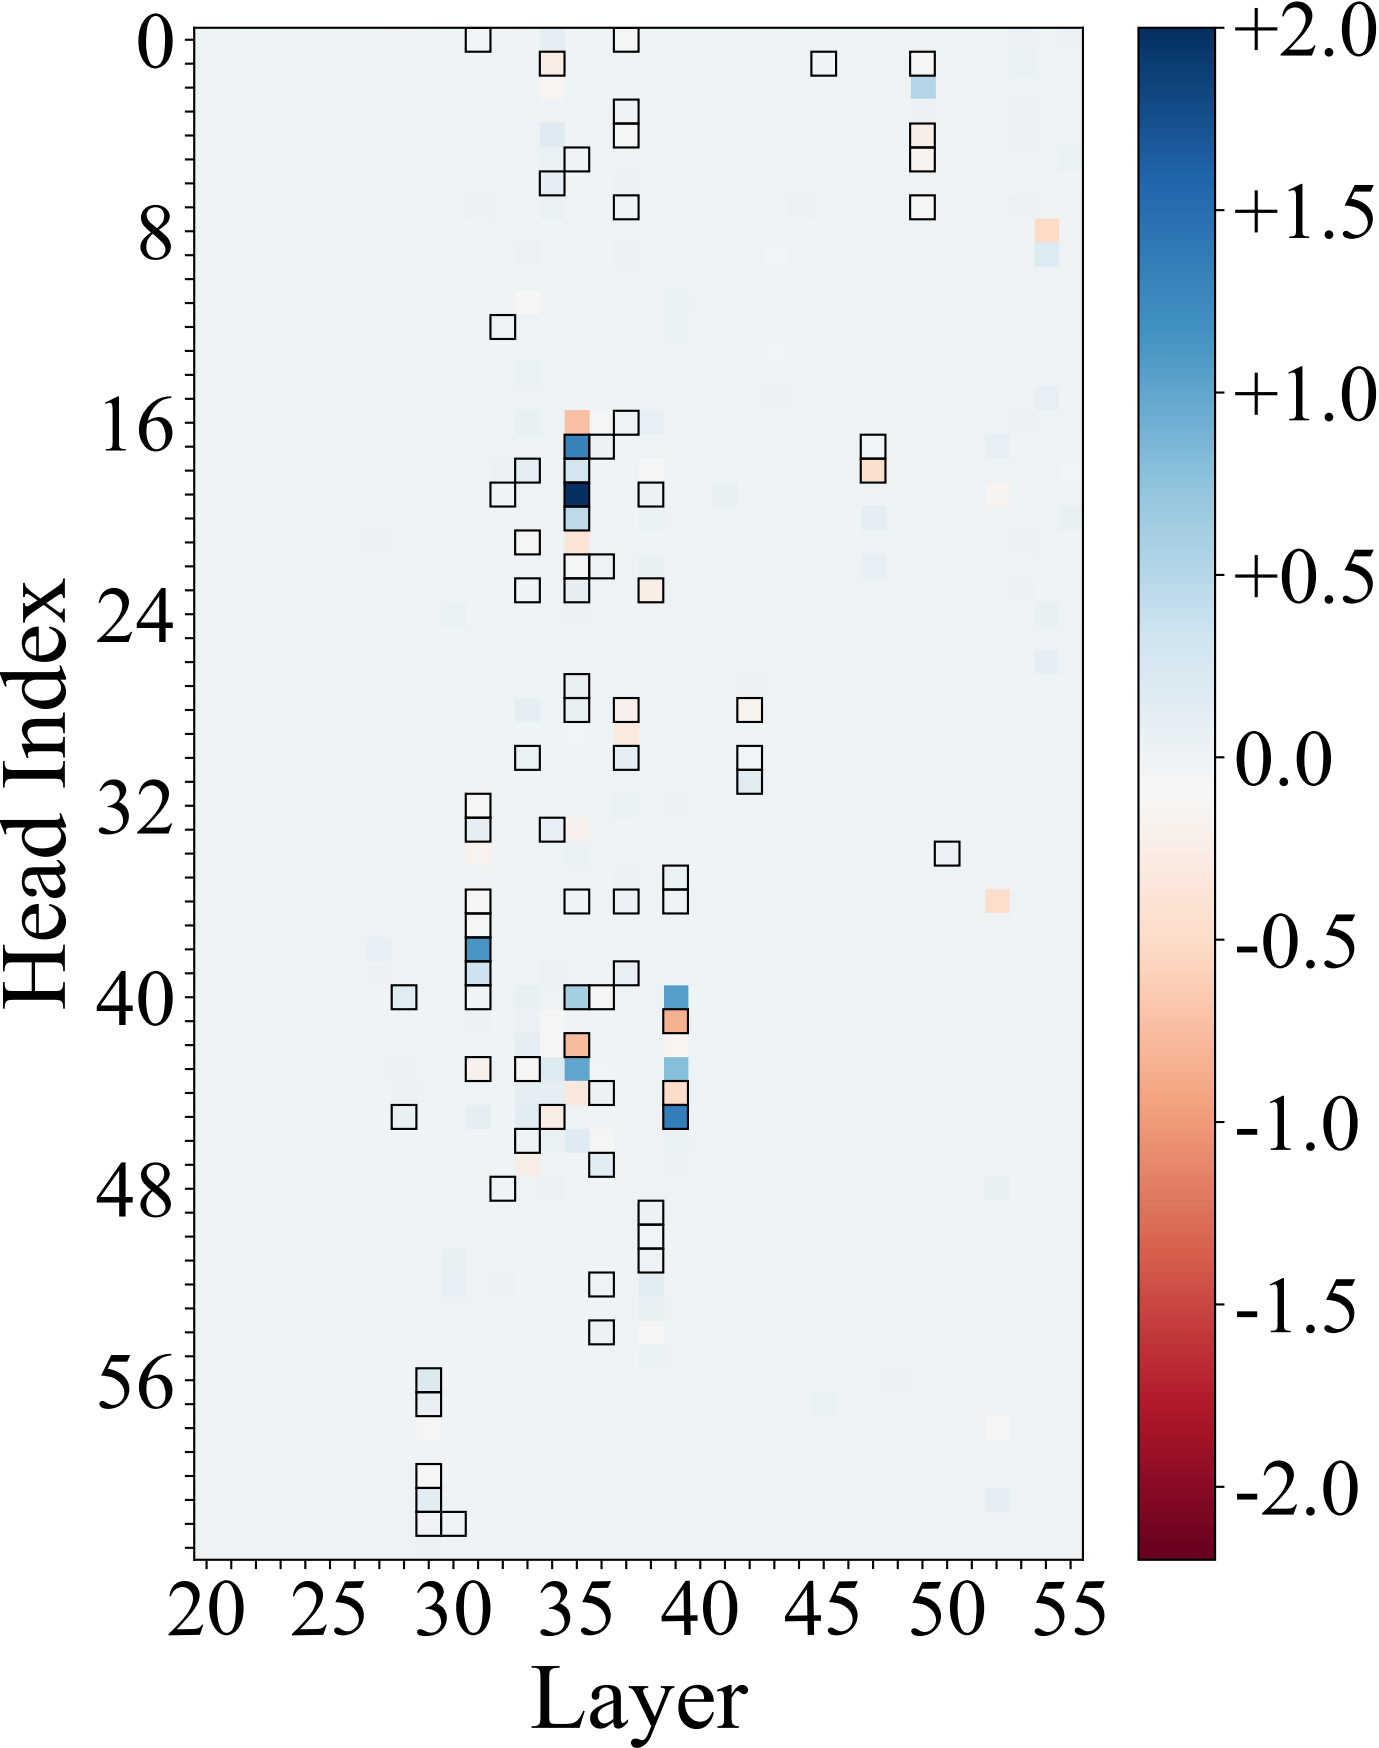

Supplement: supplementary_material [file objects-sliced.pdf › filter/notebooks/figures/Llama-3.3-70B-Instruct/aie/objects-sliced.pdf]

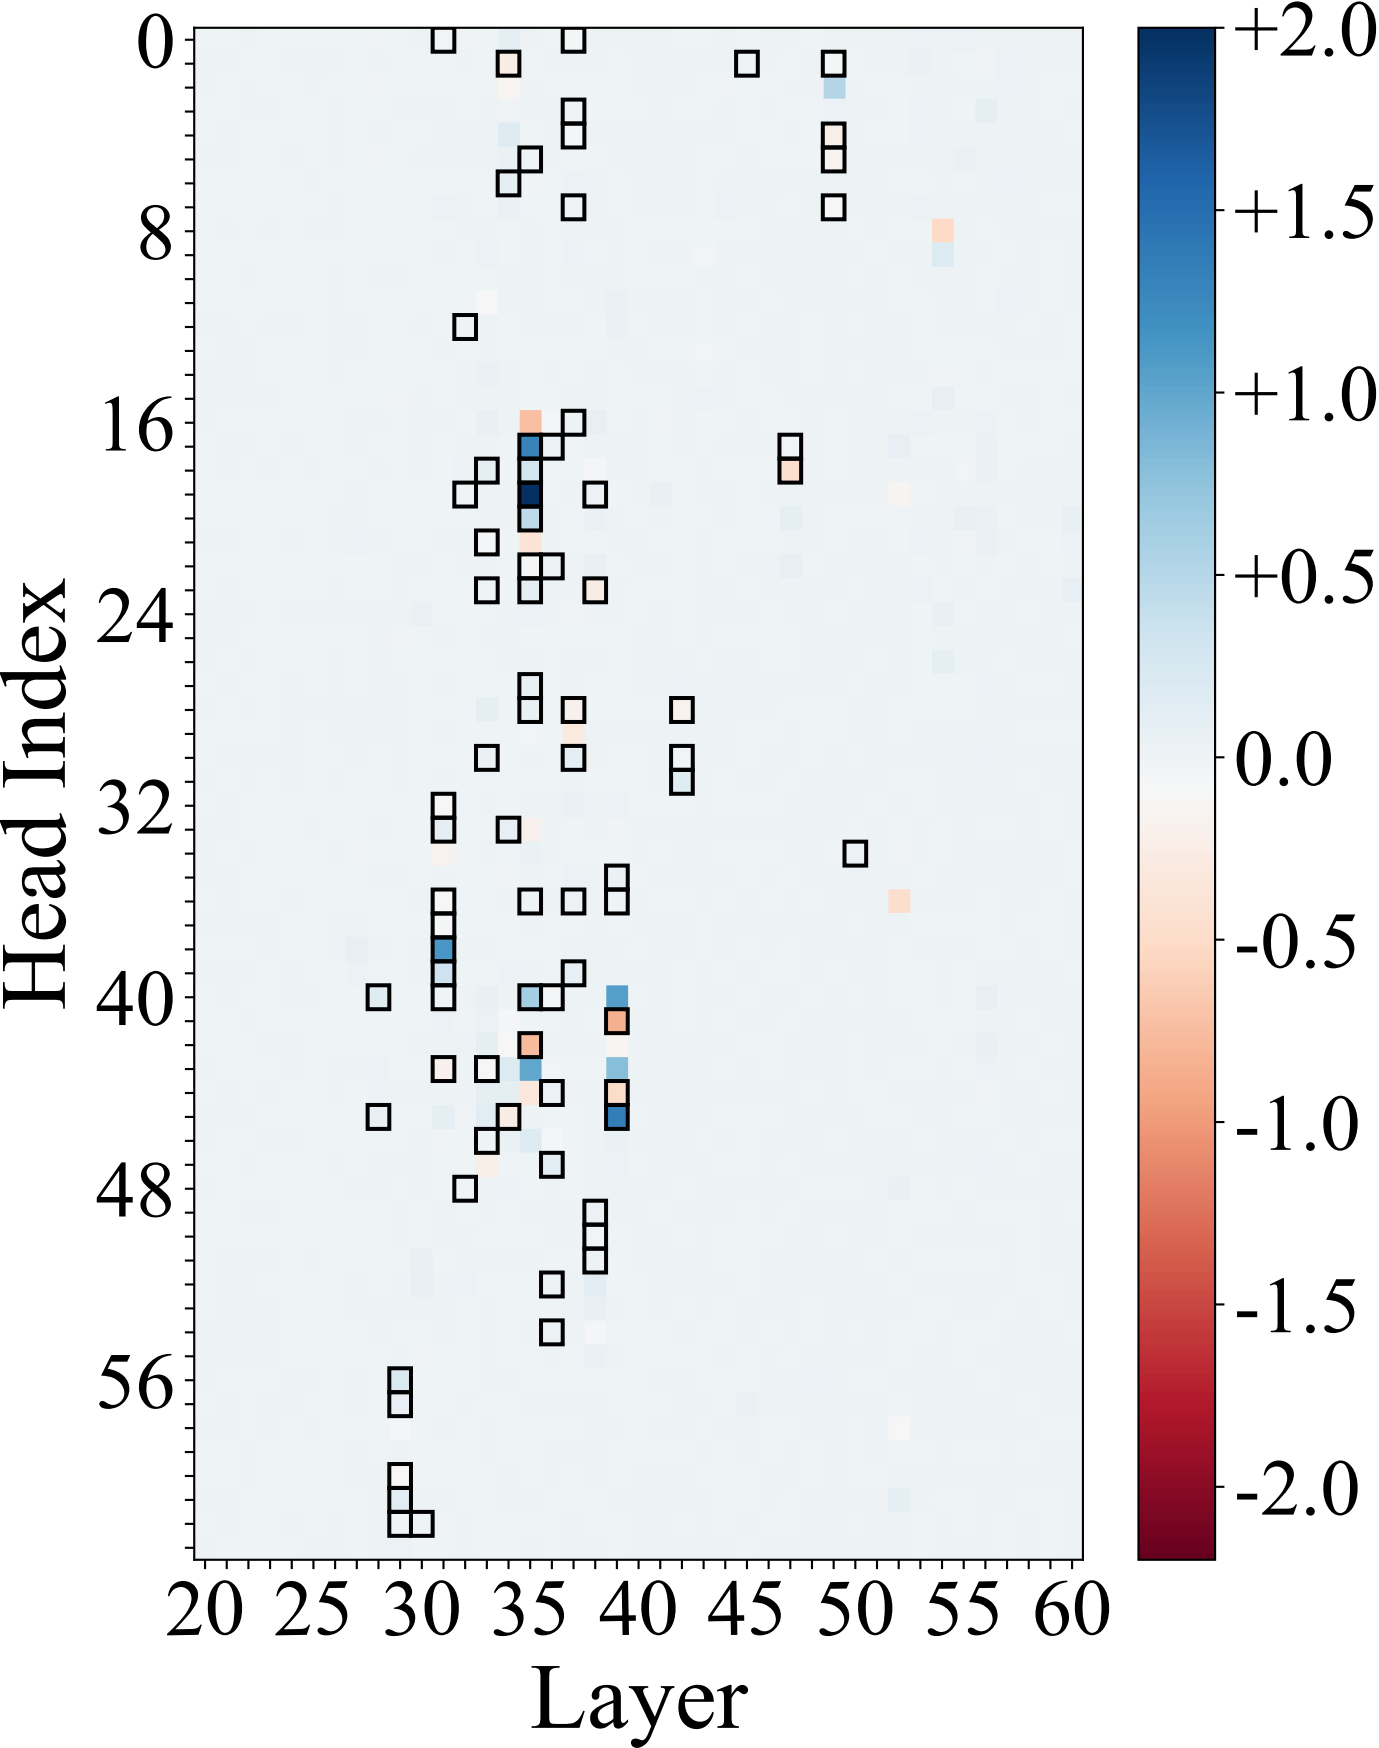

Supplement: supplementary_material [file objects-slided.pdf › filter/notebooks/figures/Llama-3.3-70B-Instruct/aie/objects-slided.pdf]

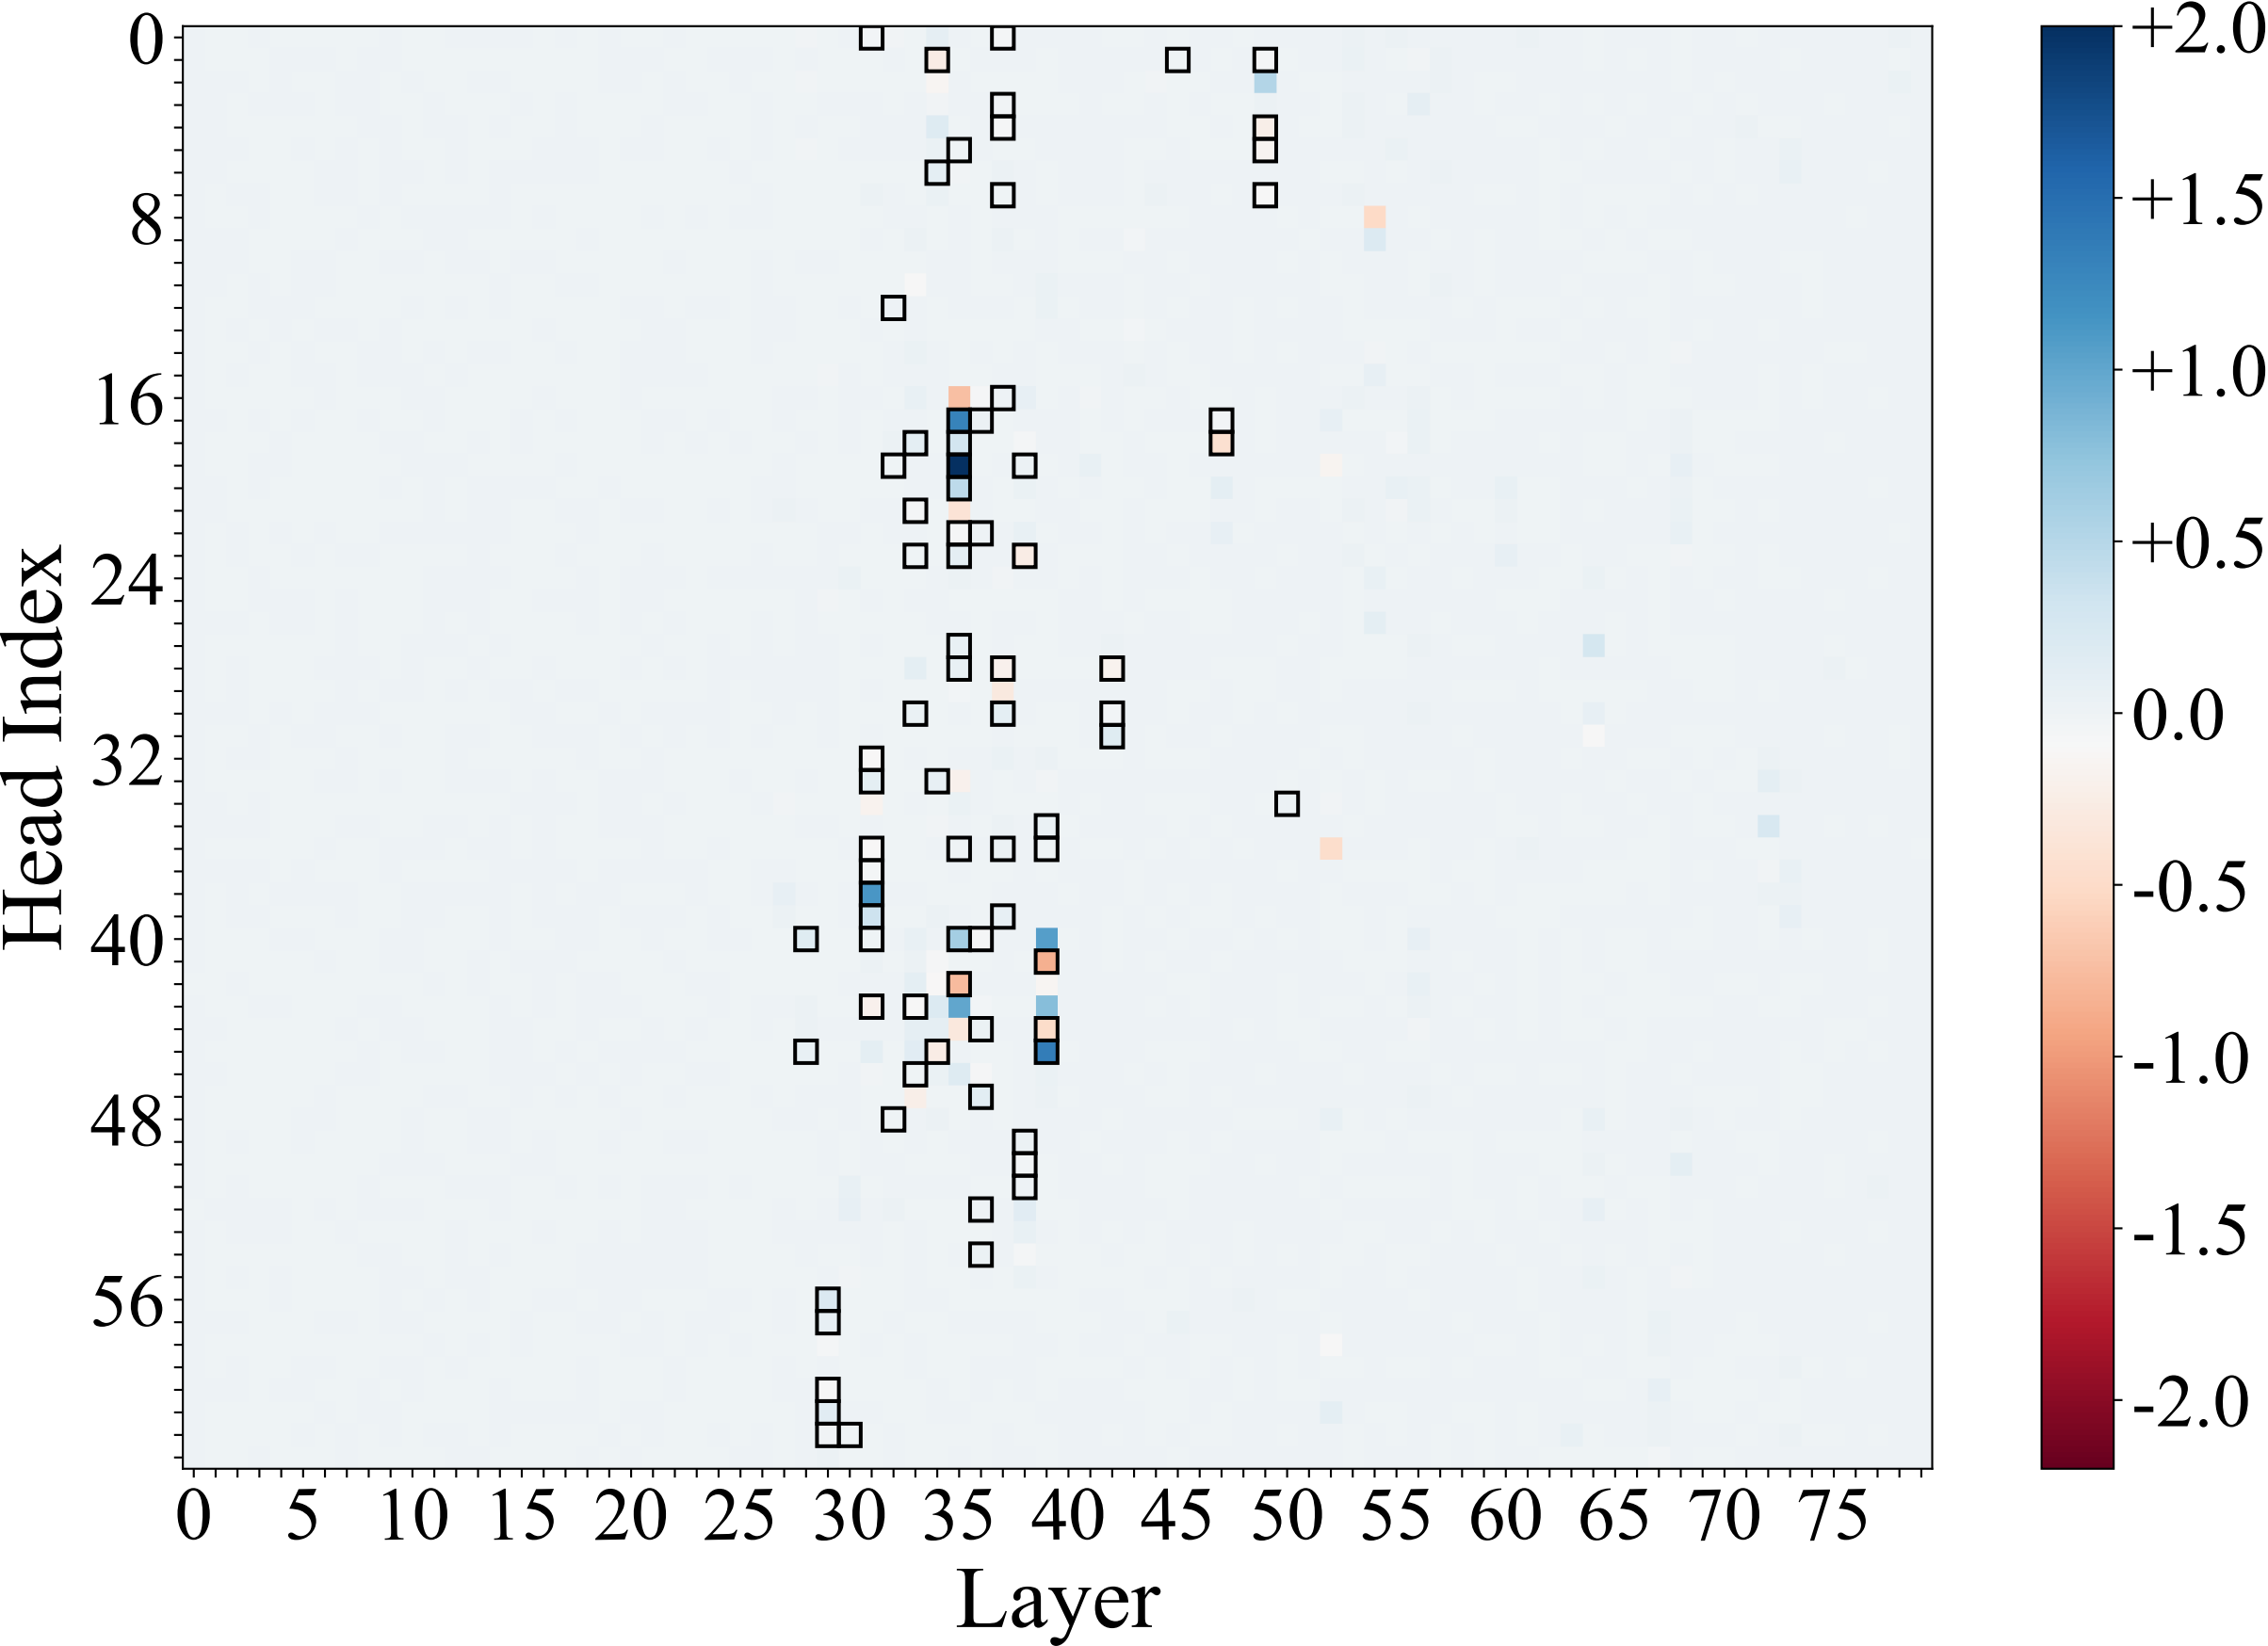

Supplement: supplementary_material [file objects.pdf › filter/notebooks/figures/Llama-3.3-70B-Instruct/aie/objects.pdf]

# Residual | Llama-3.3-70B-Instruct

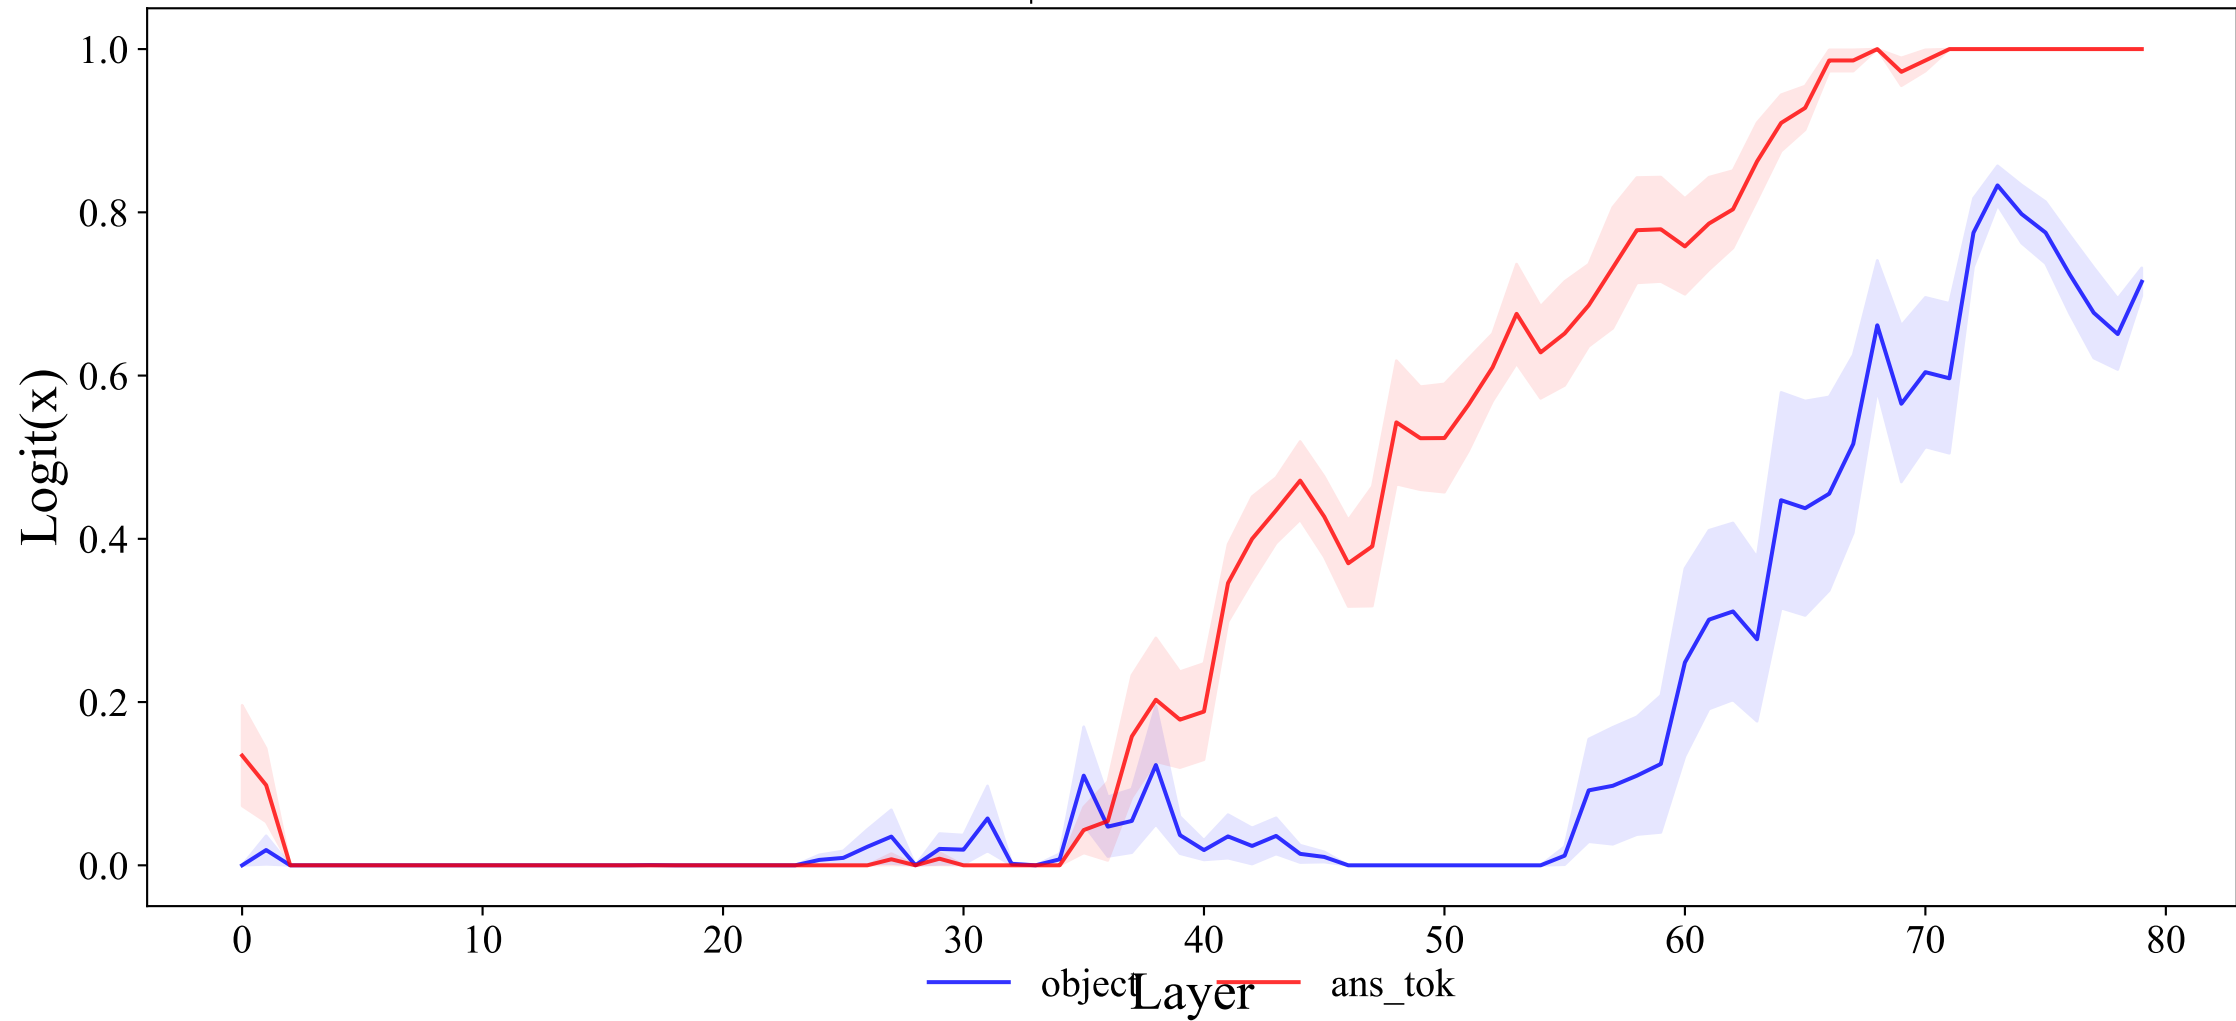

Supplement: supplementary_material [file template_3.pdf › filter/notebooks/figures/Llama-3.3-70B-Instruct/logit_lens_contribution/template_3.pdf]

residual\_2.pdf | Llama-3.3-70B-Instruct

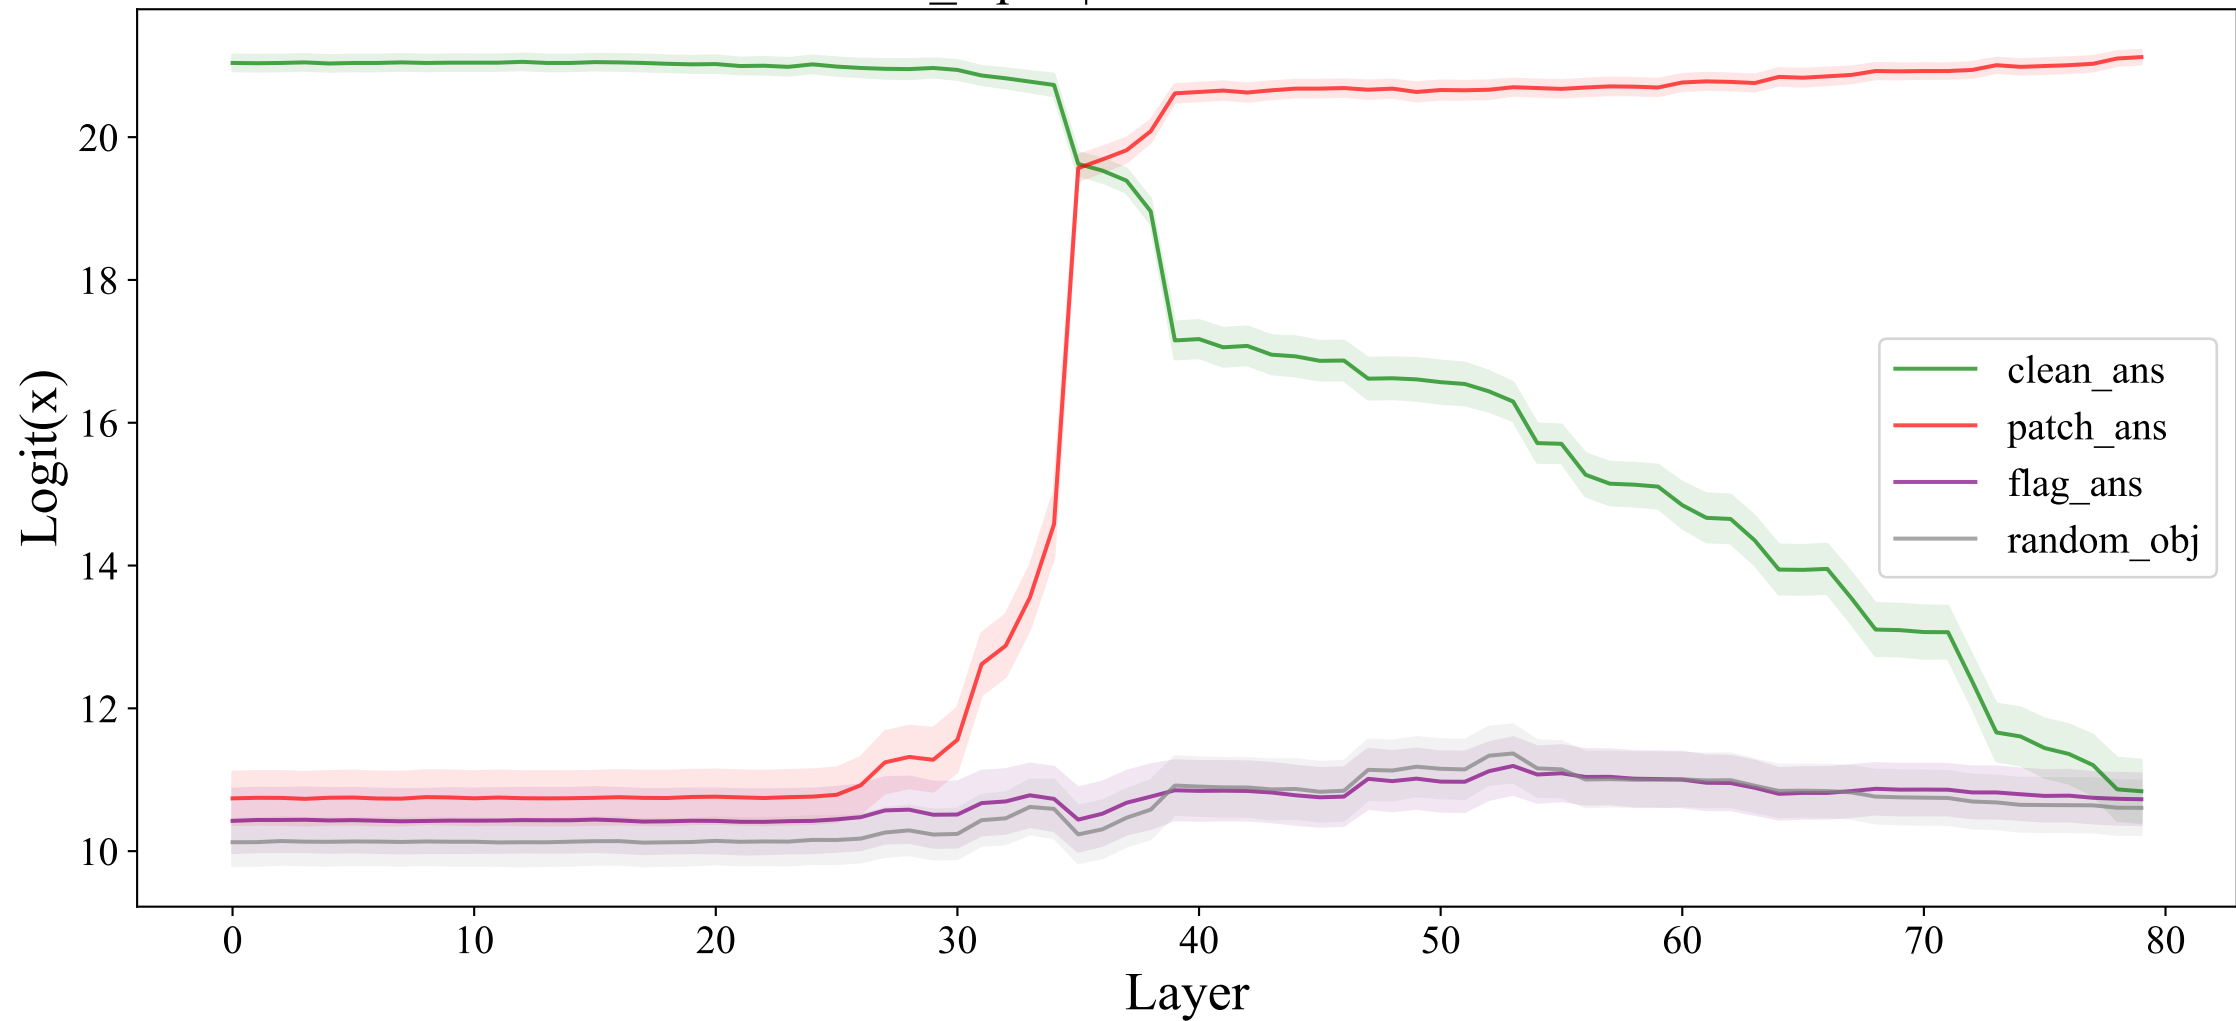

Supplement: supplementary_material [file residual_2.pdf › filter/notebooks/figures/Llama-3.3-70B-Instruct/residual/residual_2.pdf]

residual\_2\_flag\_ablate.pdf | Llama-3.3-70B-Instruct

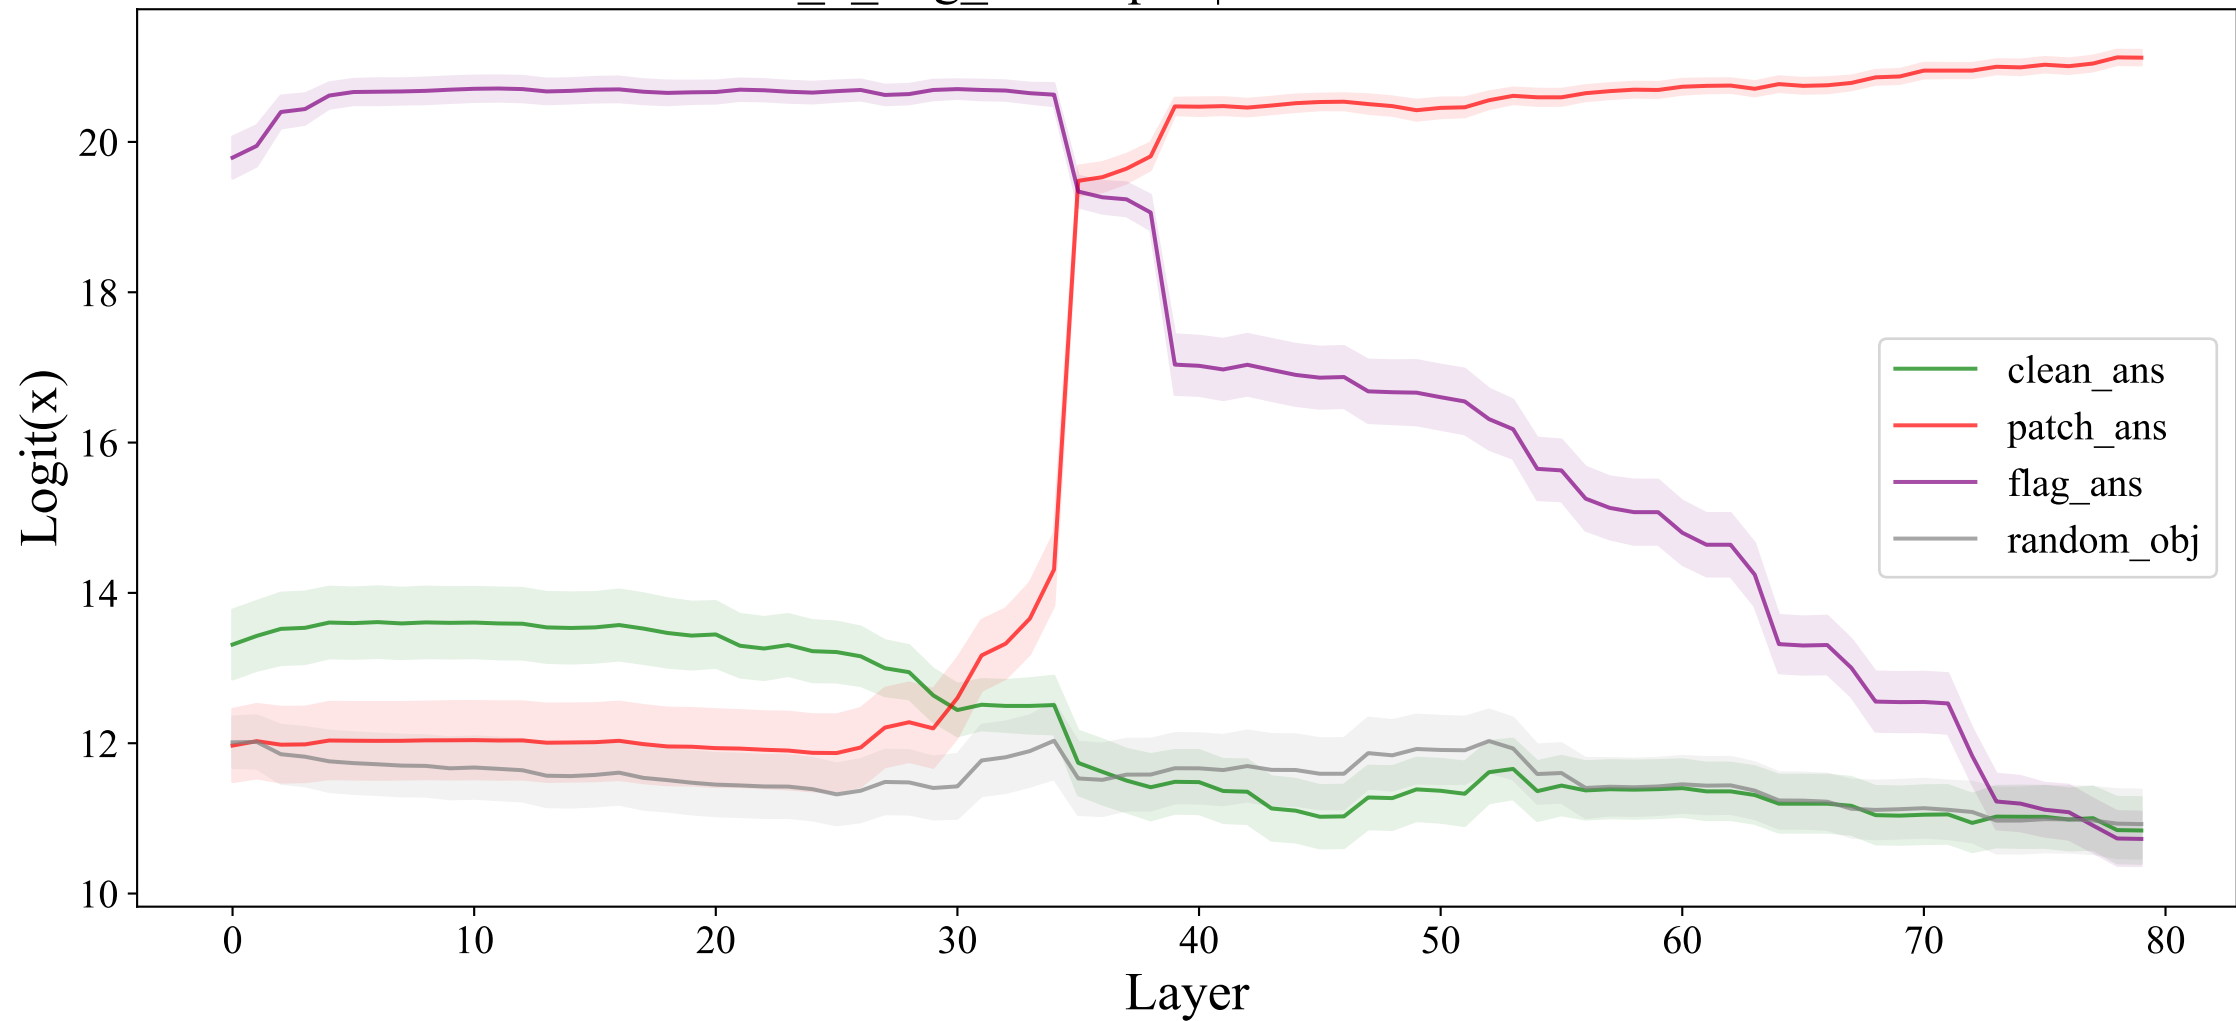

Supplement: supplementary_material [file residual_2_flag_ablate.pdf › filter/notebooks/figures/Llama-3.3-70B-Instruct/residual/residual_2_flag_ablate.pdf]

residual\_3.pdf | Llama-3.3-70B-Instruct

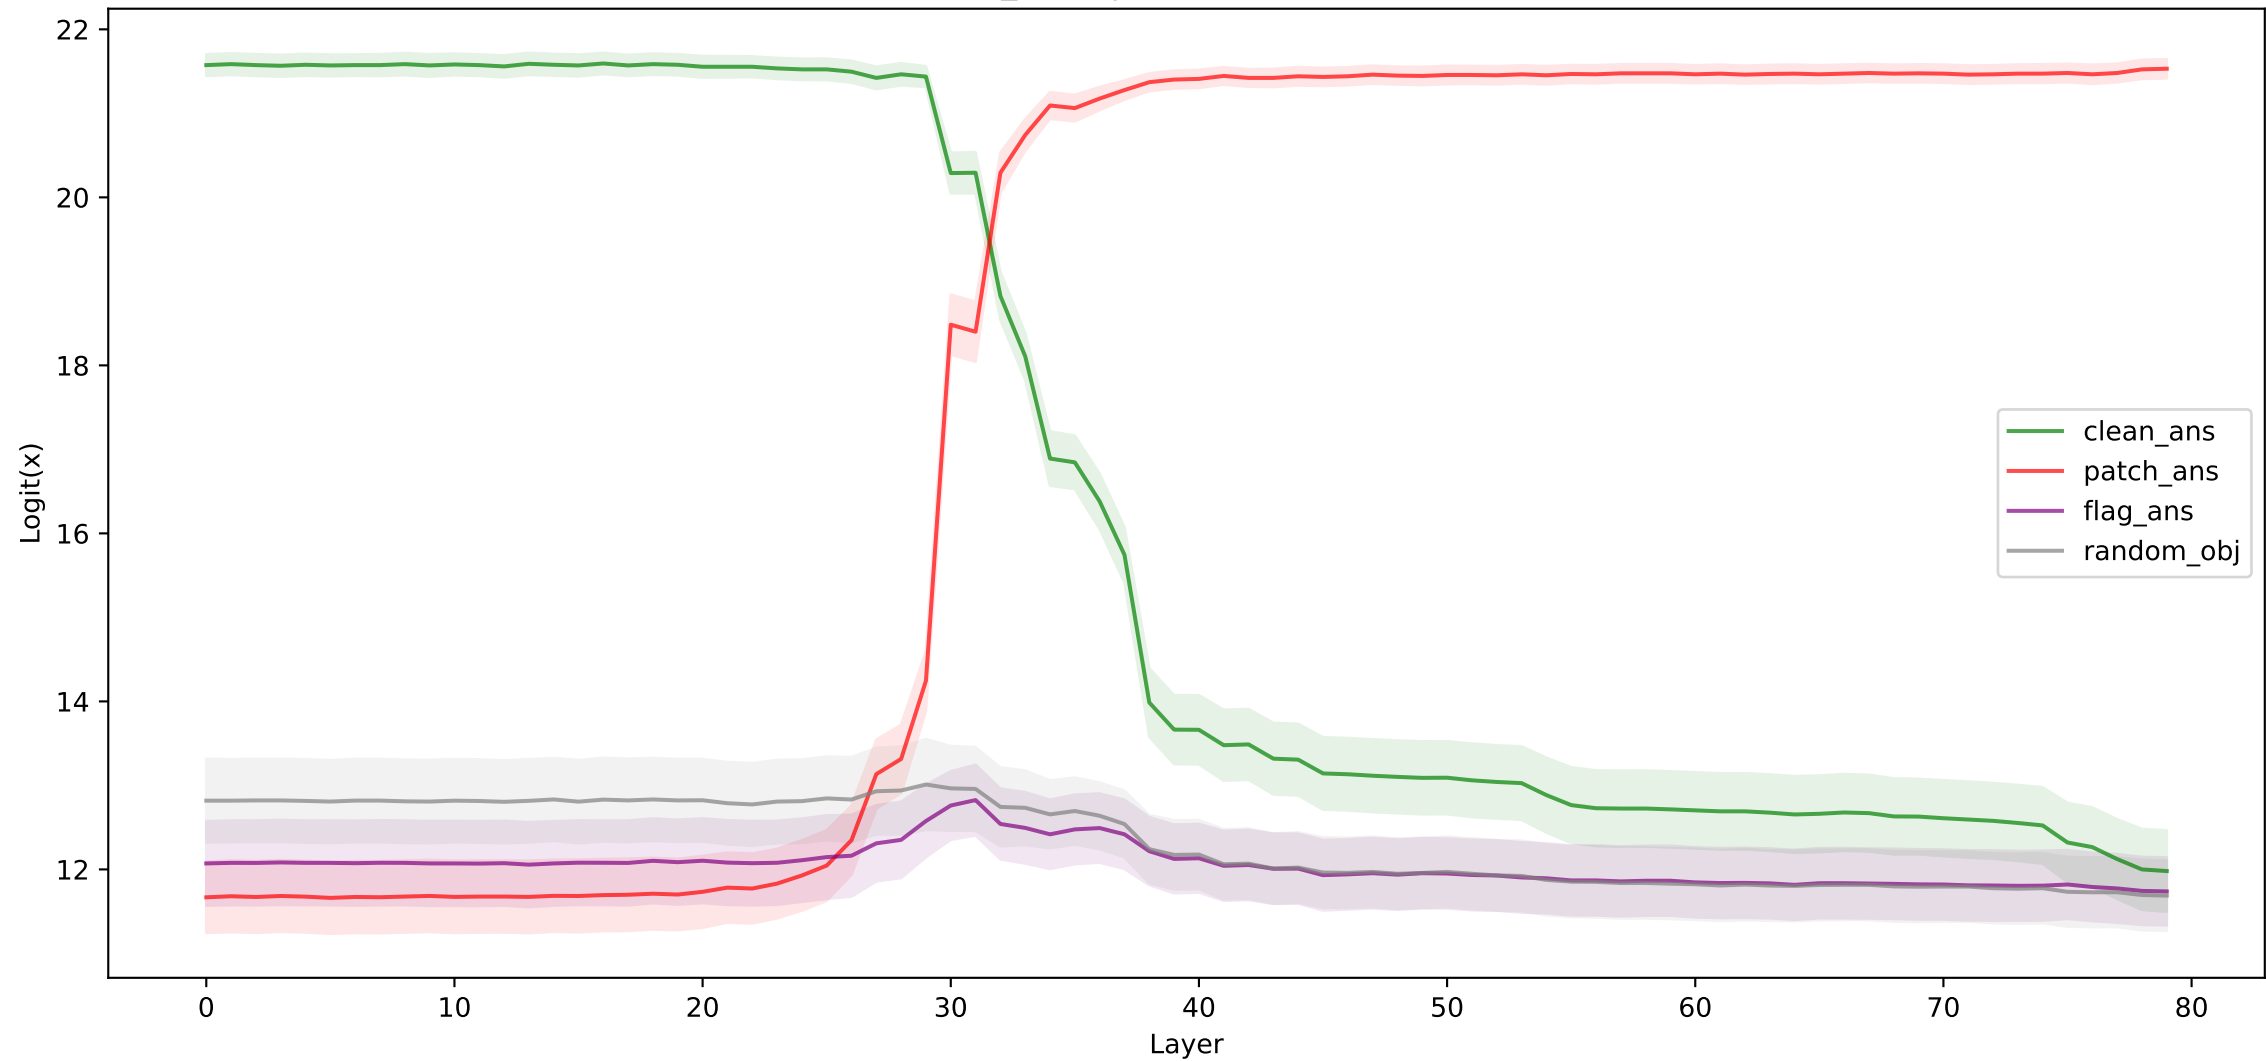

Supplement: supplementary_material [file residual_3.pdf › filter/notebooks/figures/Llama-3.3-70B-Instruct/residual/residual_3.pdf]

residual\_3\_flag\_ablate.pdf | Llama-3.3-70B-Instruct

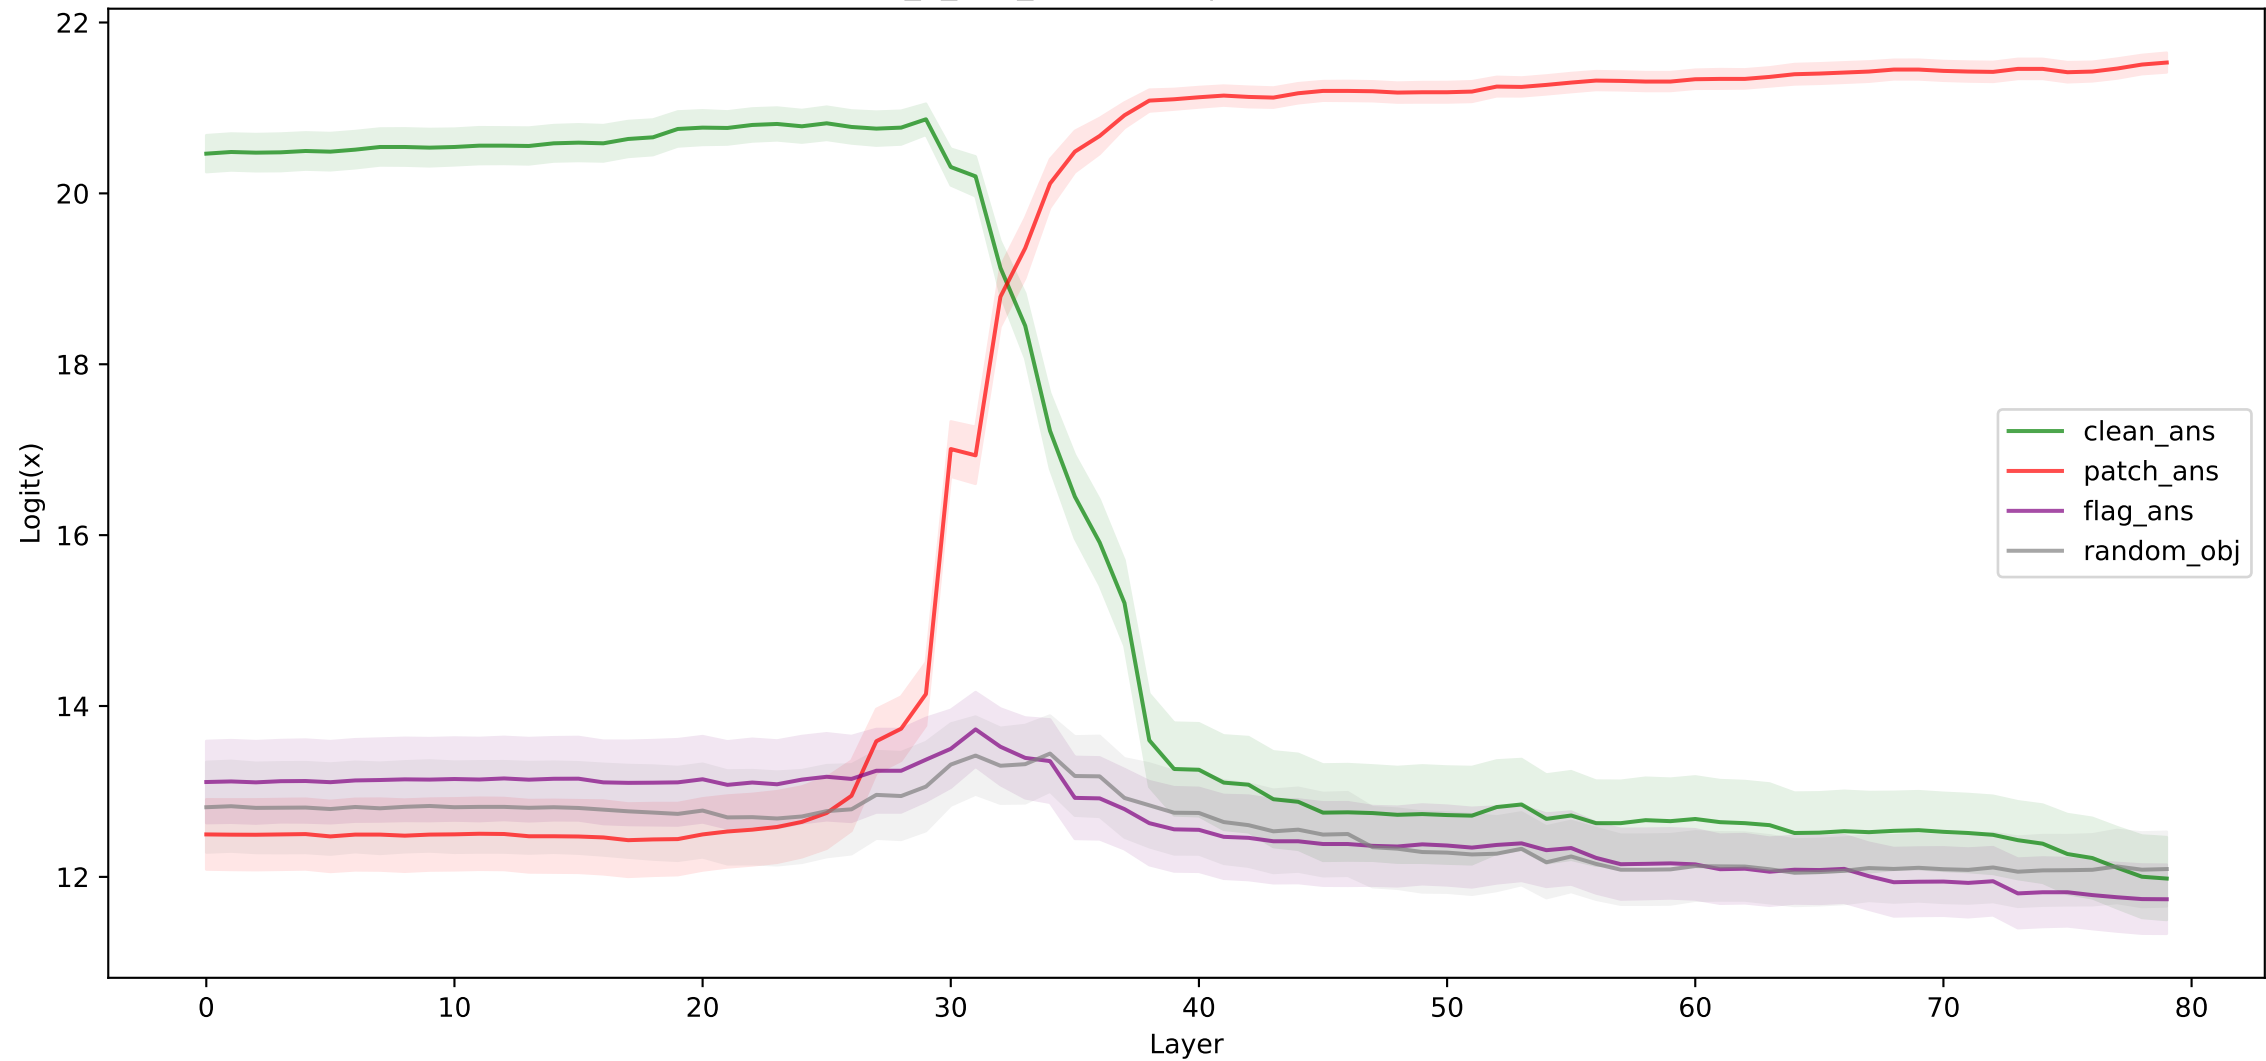

Supplement: supplementary_material [file residual_3_flag_ablate.pdf › filter/notebooks/figures/Llama-3.3-70B-Instruct/residual/residual_3_flag_ablate.pdf]

Residual | Llama-3.3-70B-Instruct

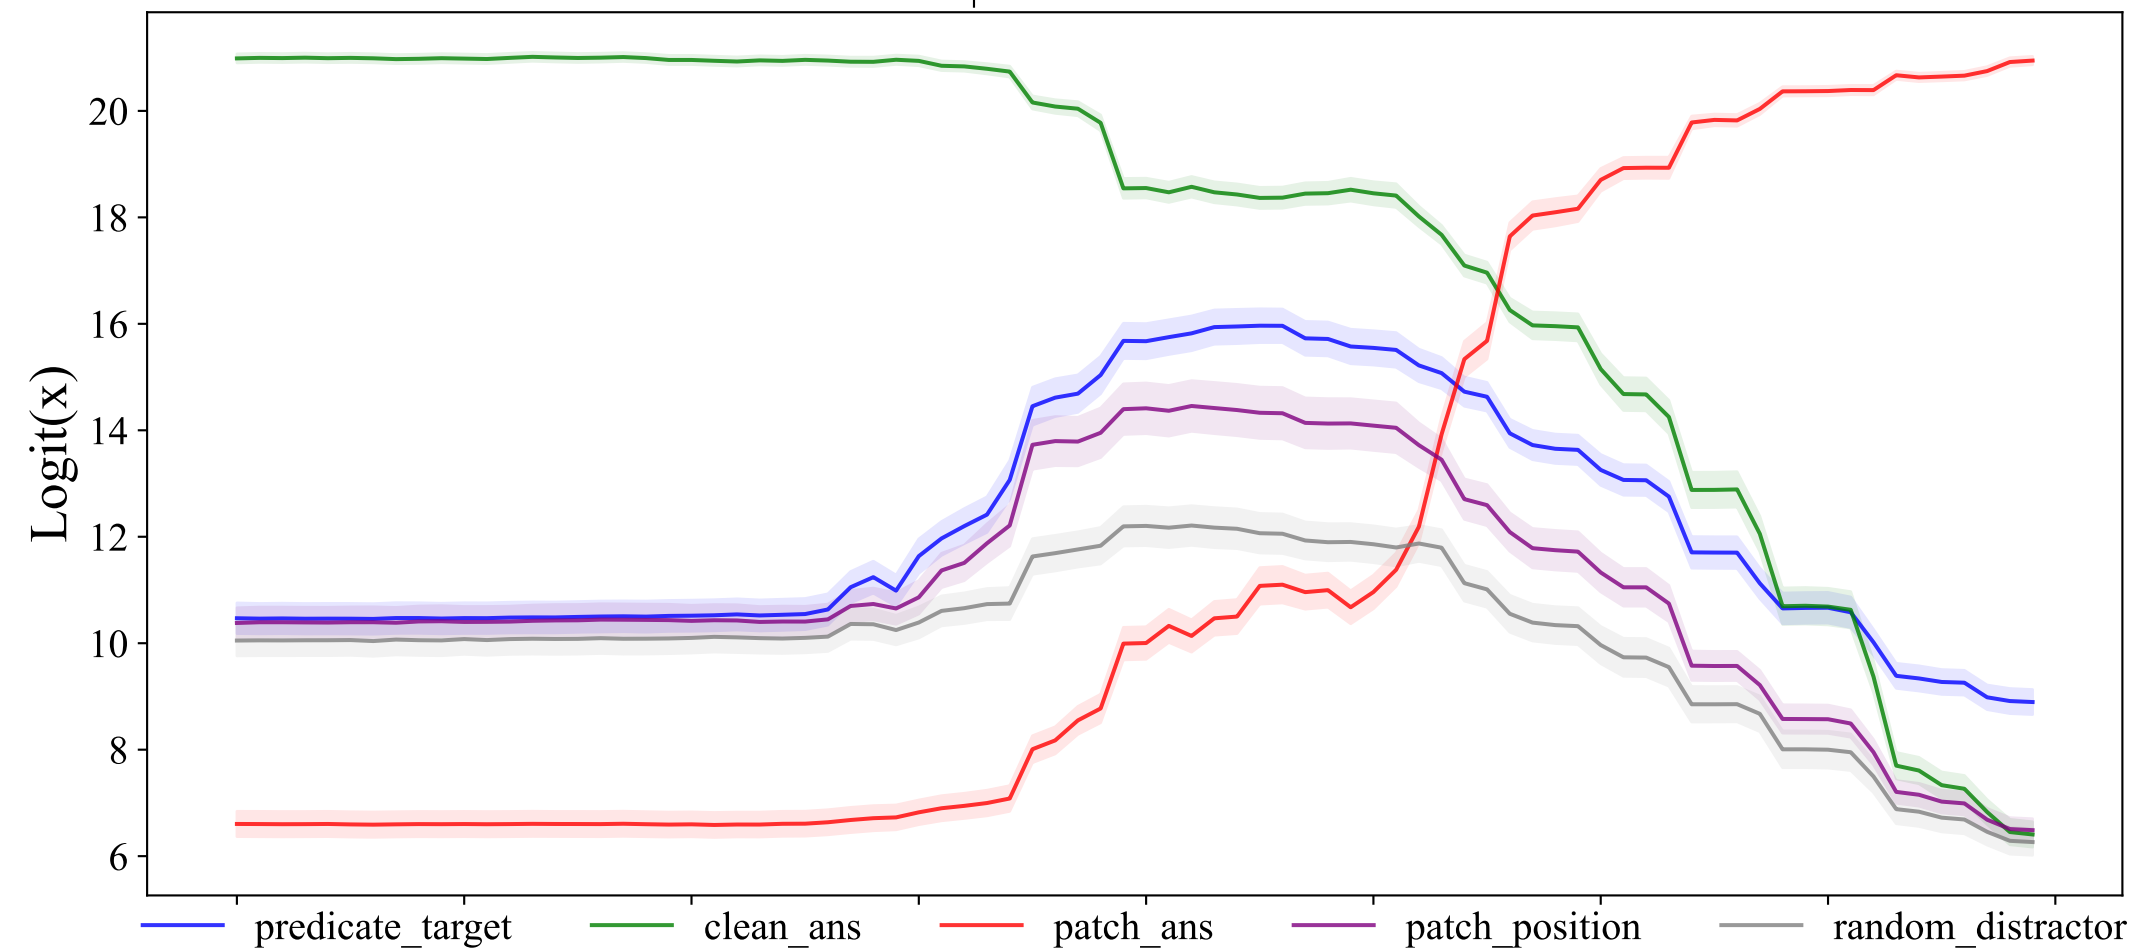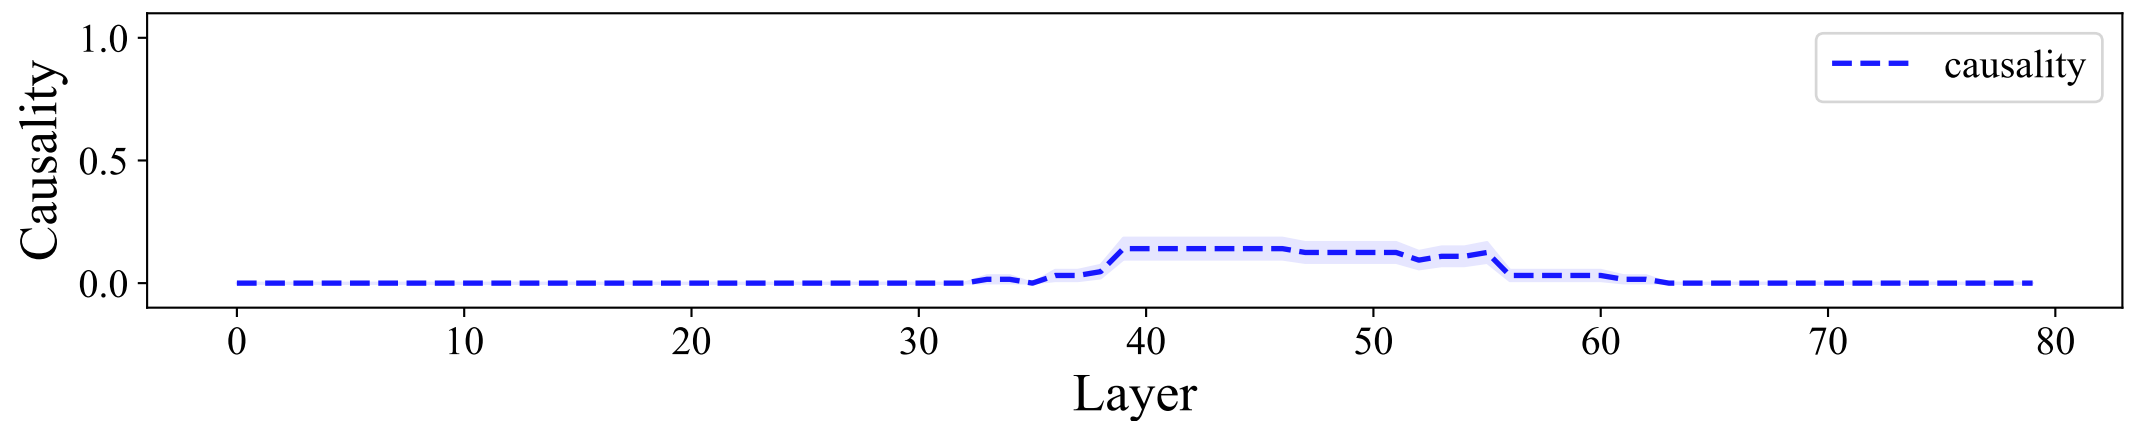

Supplement: supplementary_material [file template_2.pdf › filter/notebooks/figures/Llama-3.3-70B-Instruct/residual/template_2.pdf]

Residual | Llama-3.3-70B-Instruct

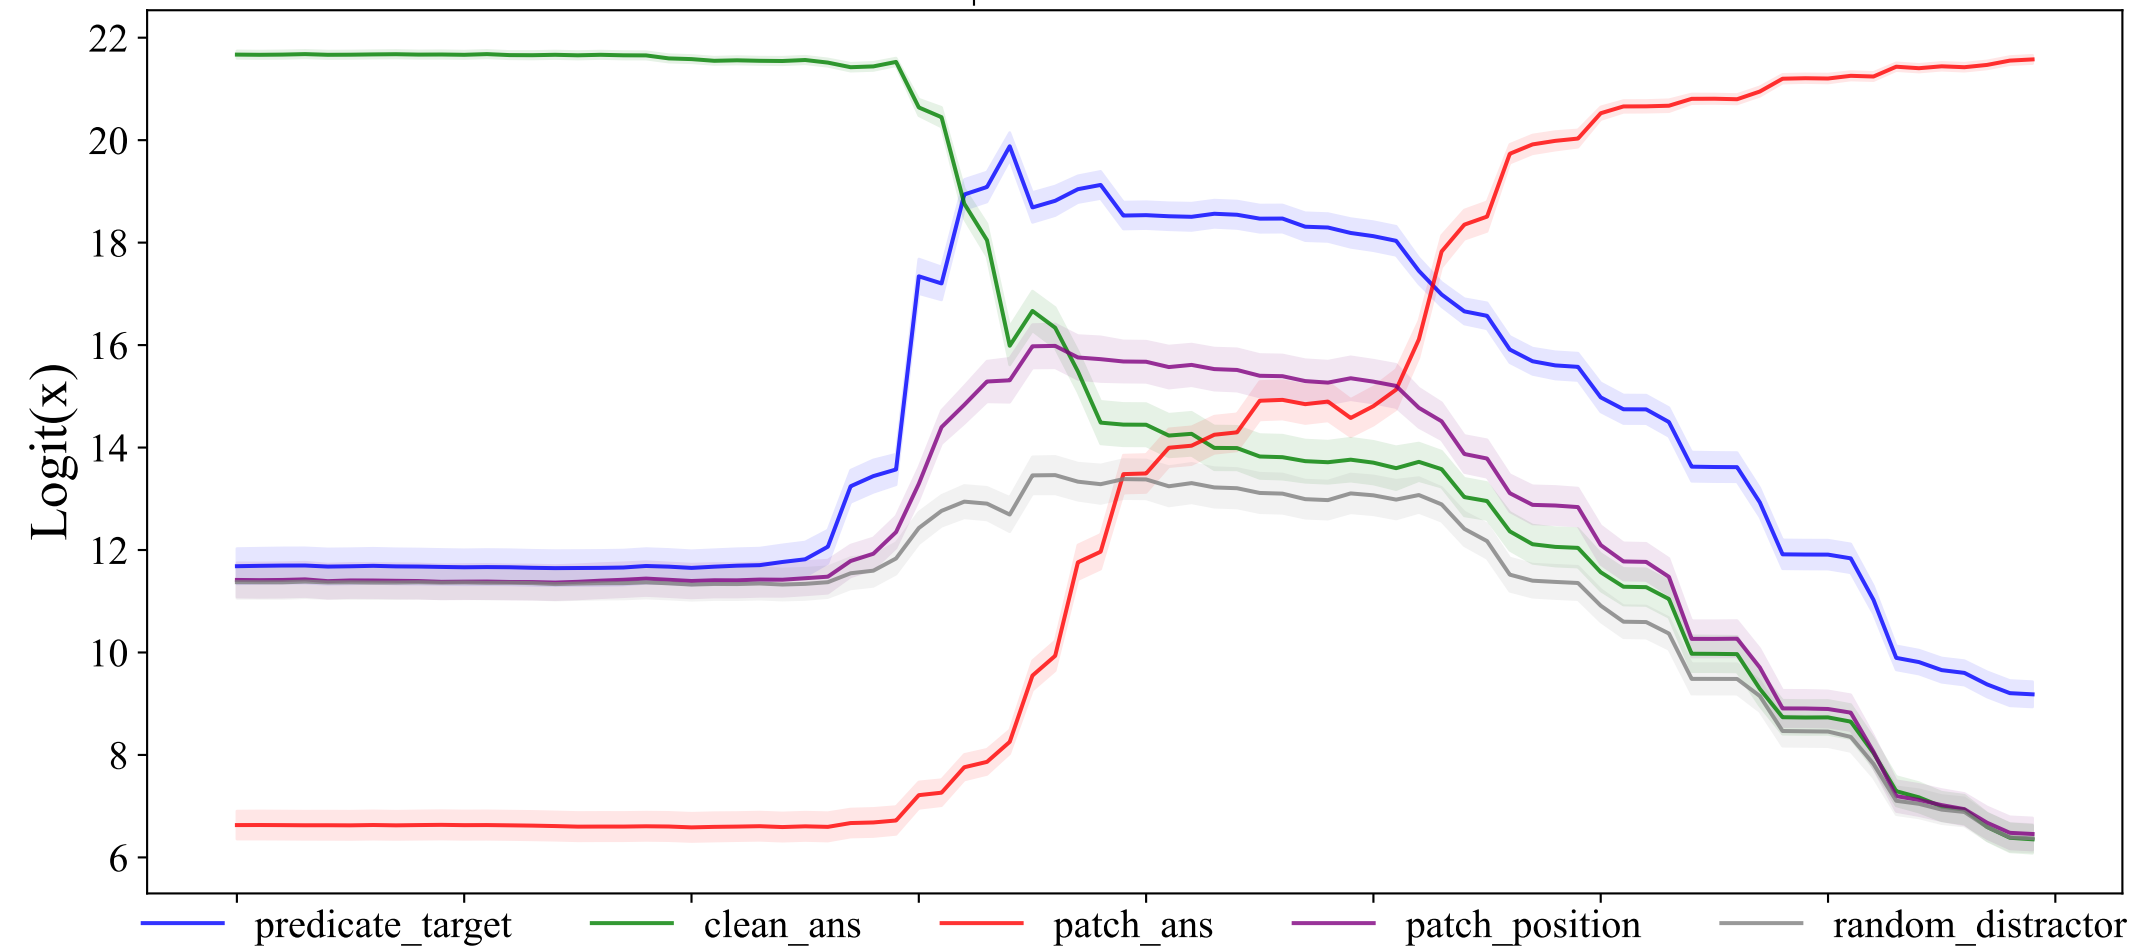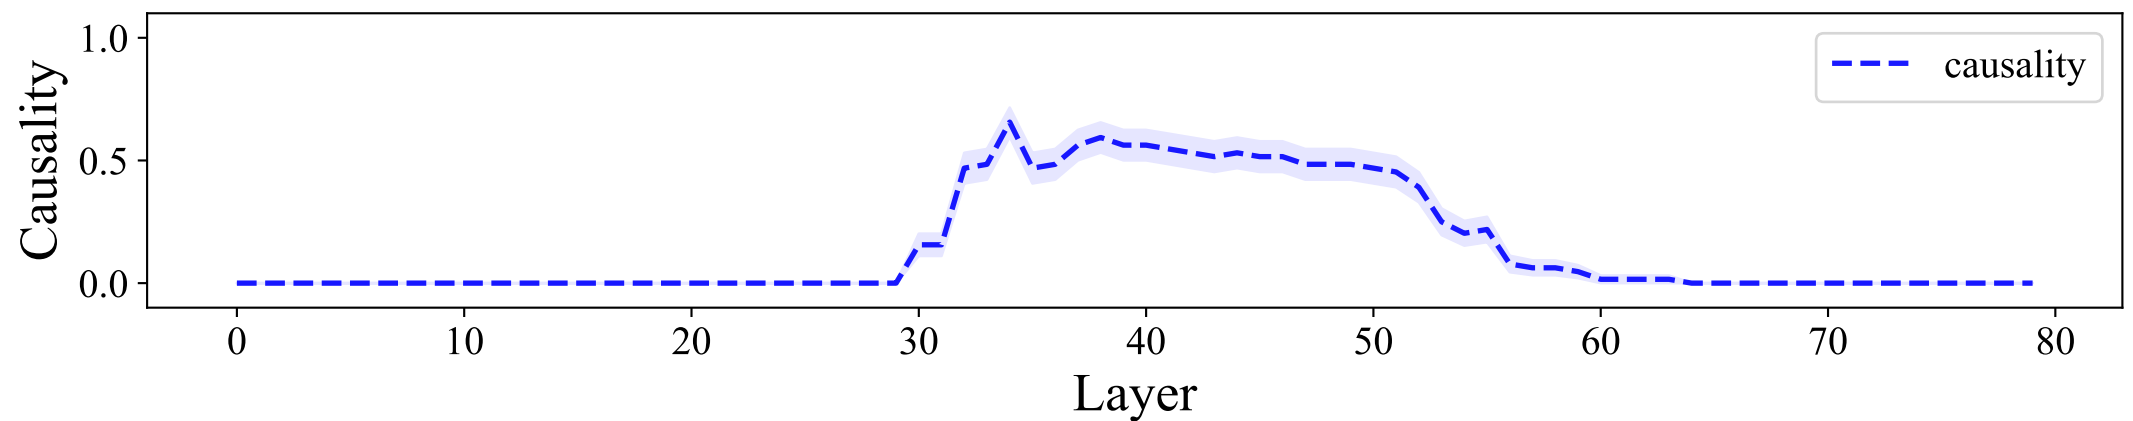

Supplement: supplementary_material [file template_3.pdf › filter/notebooks/figures/Llama-3.3-70B-Instruct/residual/template_3.pdf]

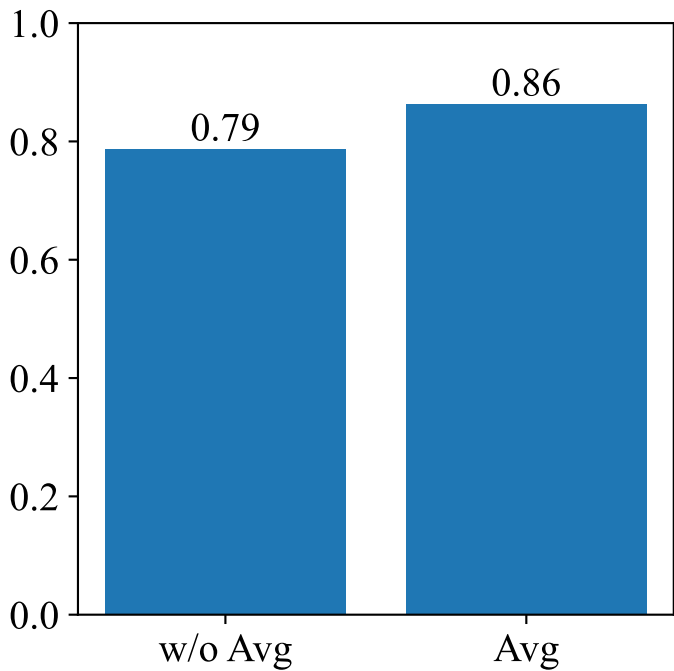

Supplement: supplementary_material [file avg_trick_scores.pdf › filter/notebooks/figures/avg_trick_scores.pdf]

Trained On

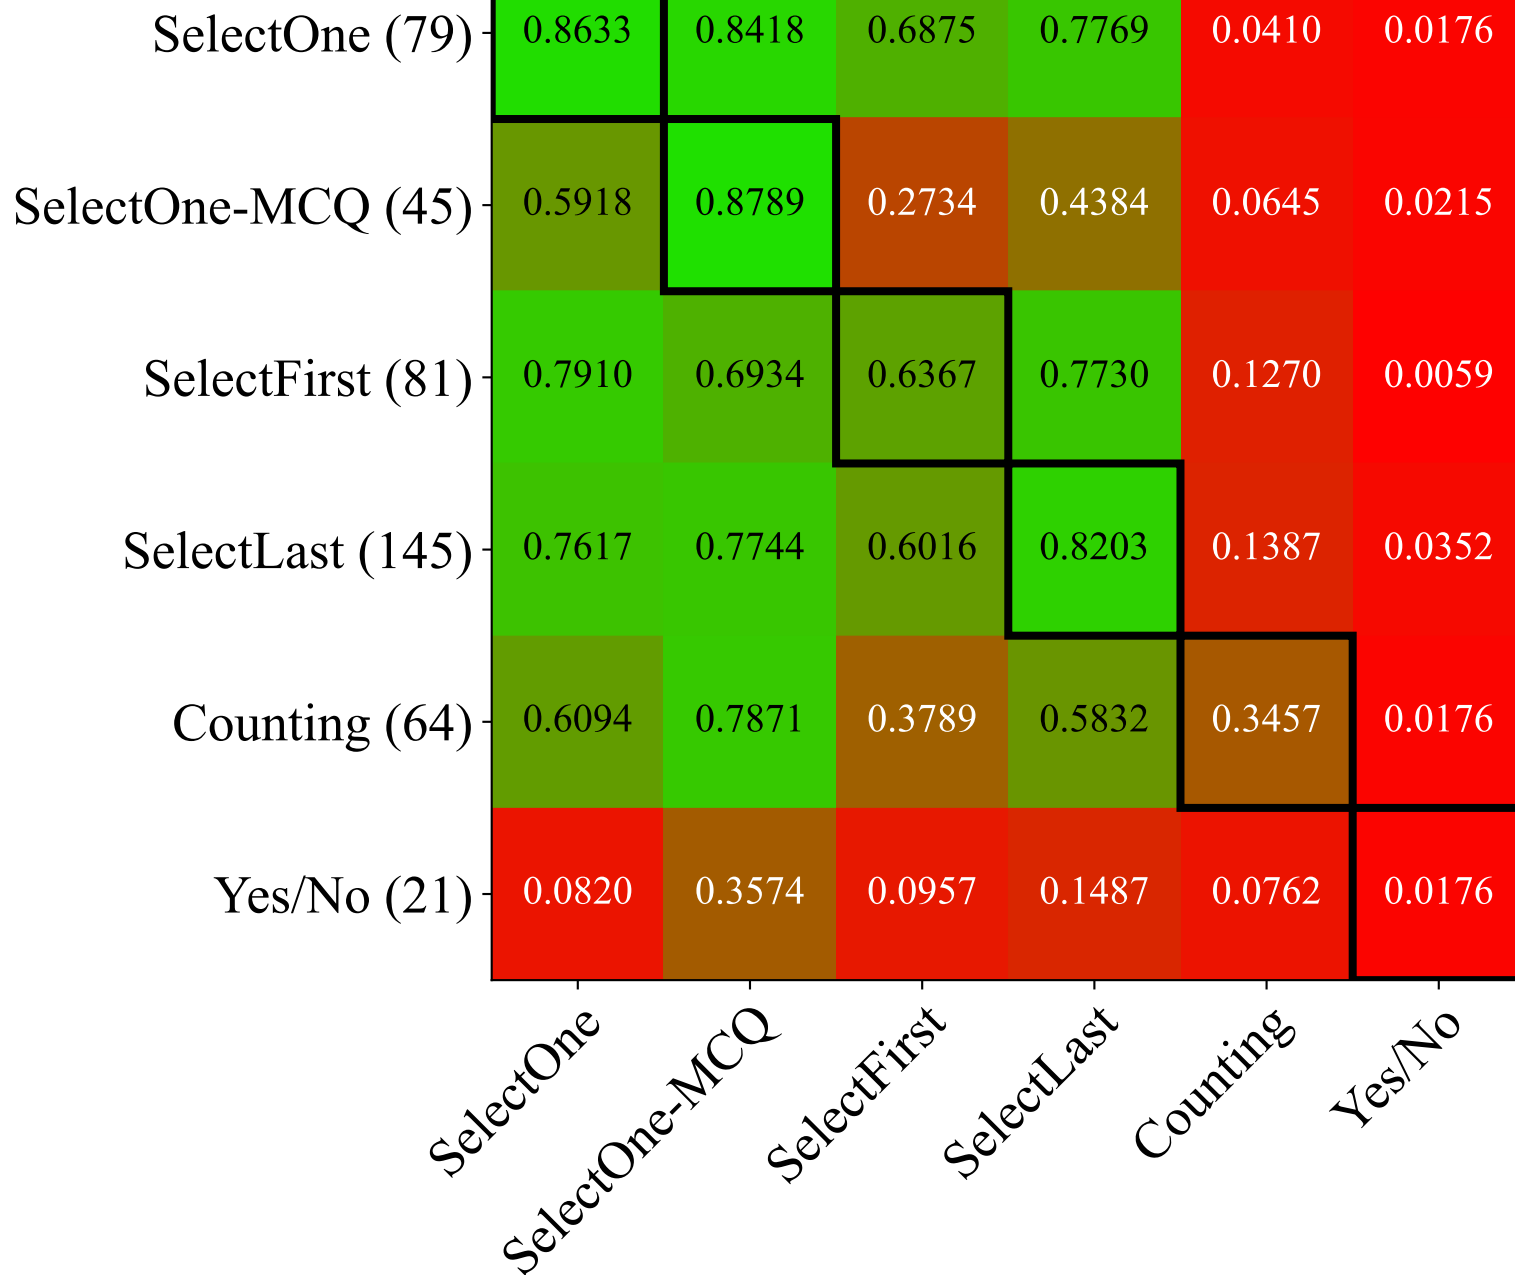

Evaluated On

Causality Value

Supplement: supplementary_material [file causality_confusion_matrix.pdf › filter/notebooks/figures/causality_confusion_matrix.pdf]

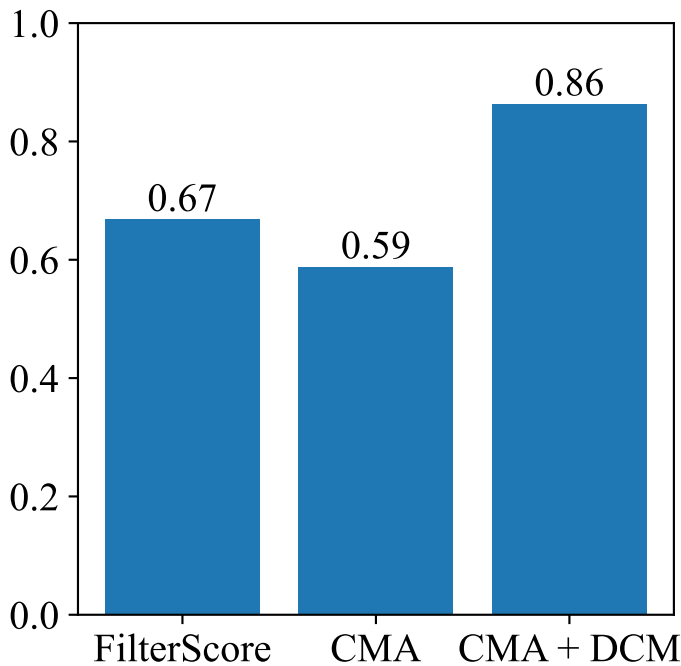

Supplement: supplementary_material [file causality_diff_approach.pdf › filter/notebooks/figures/causality_diff_approach.pdf]

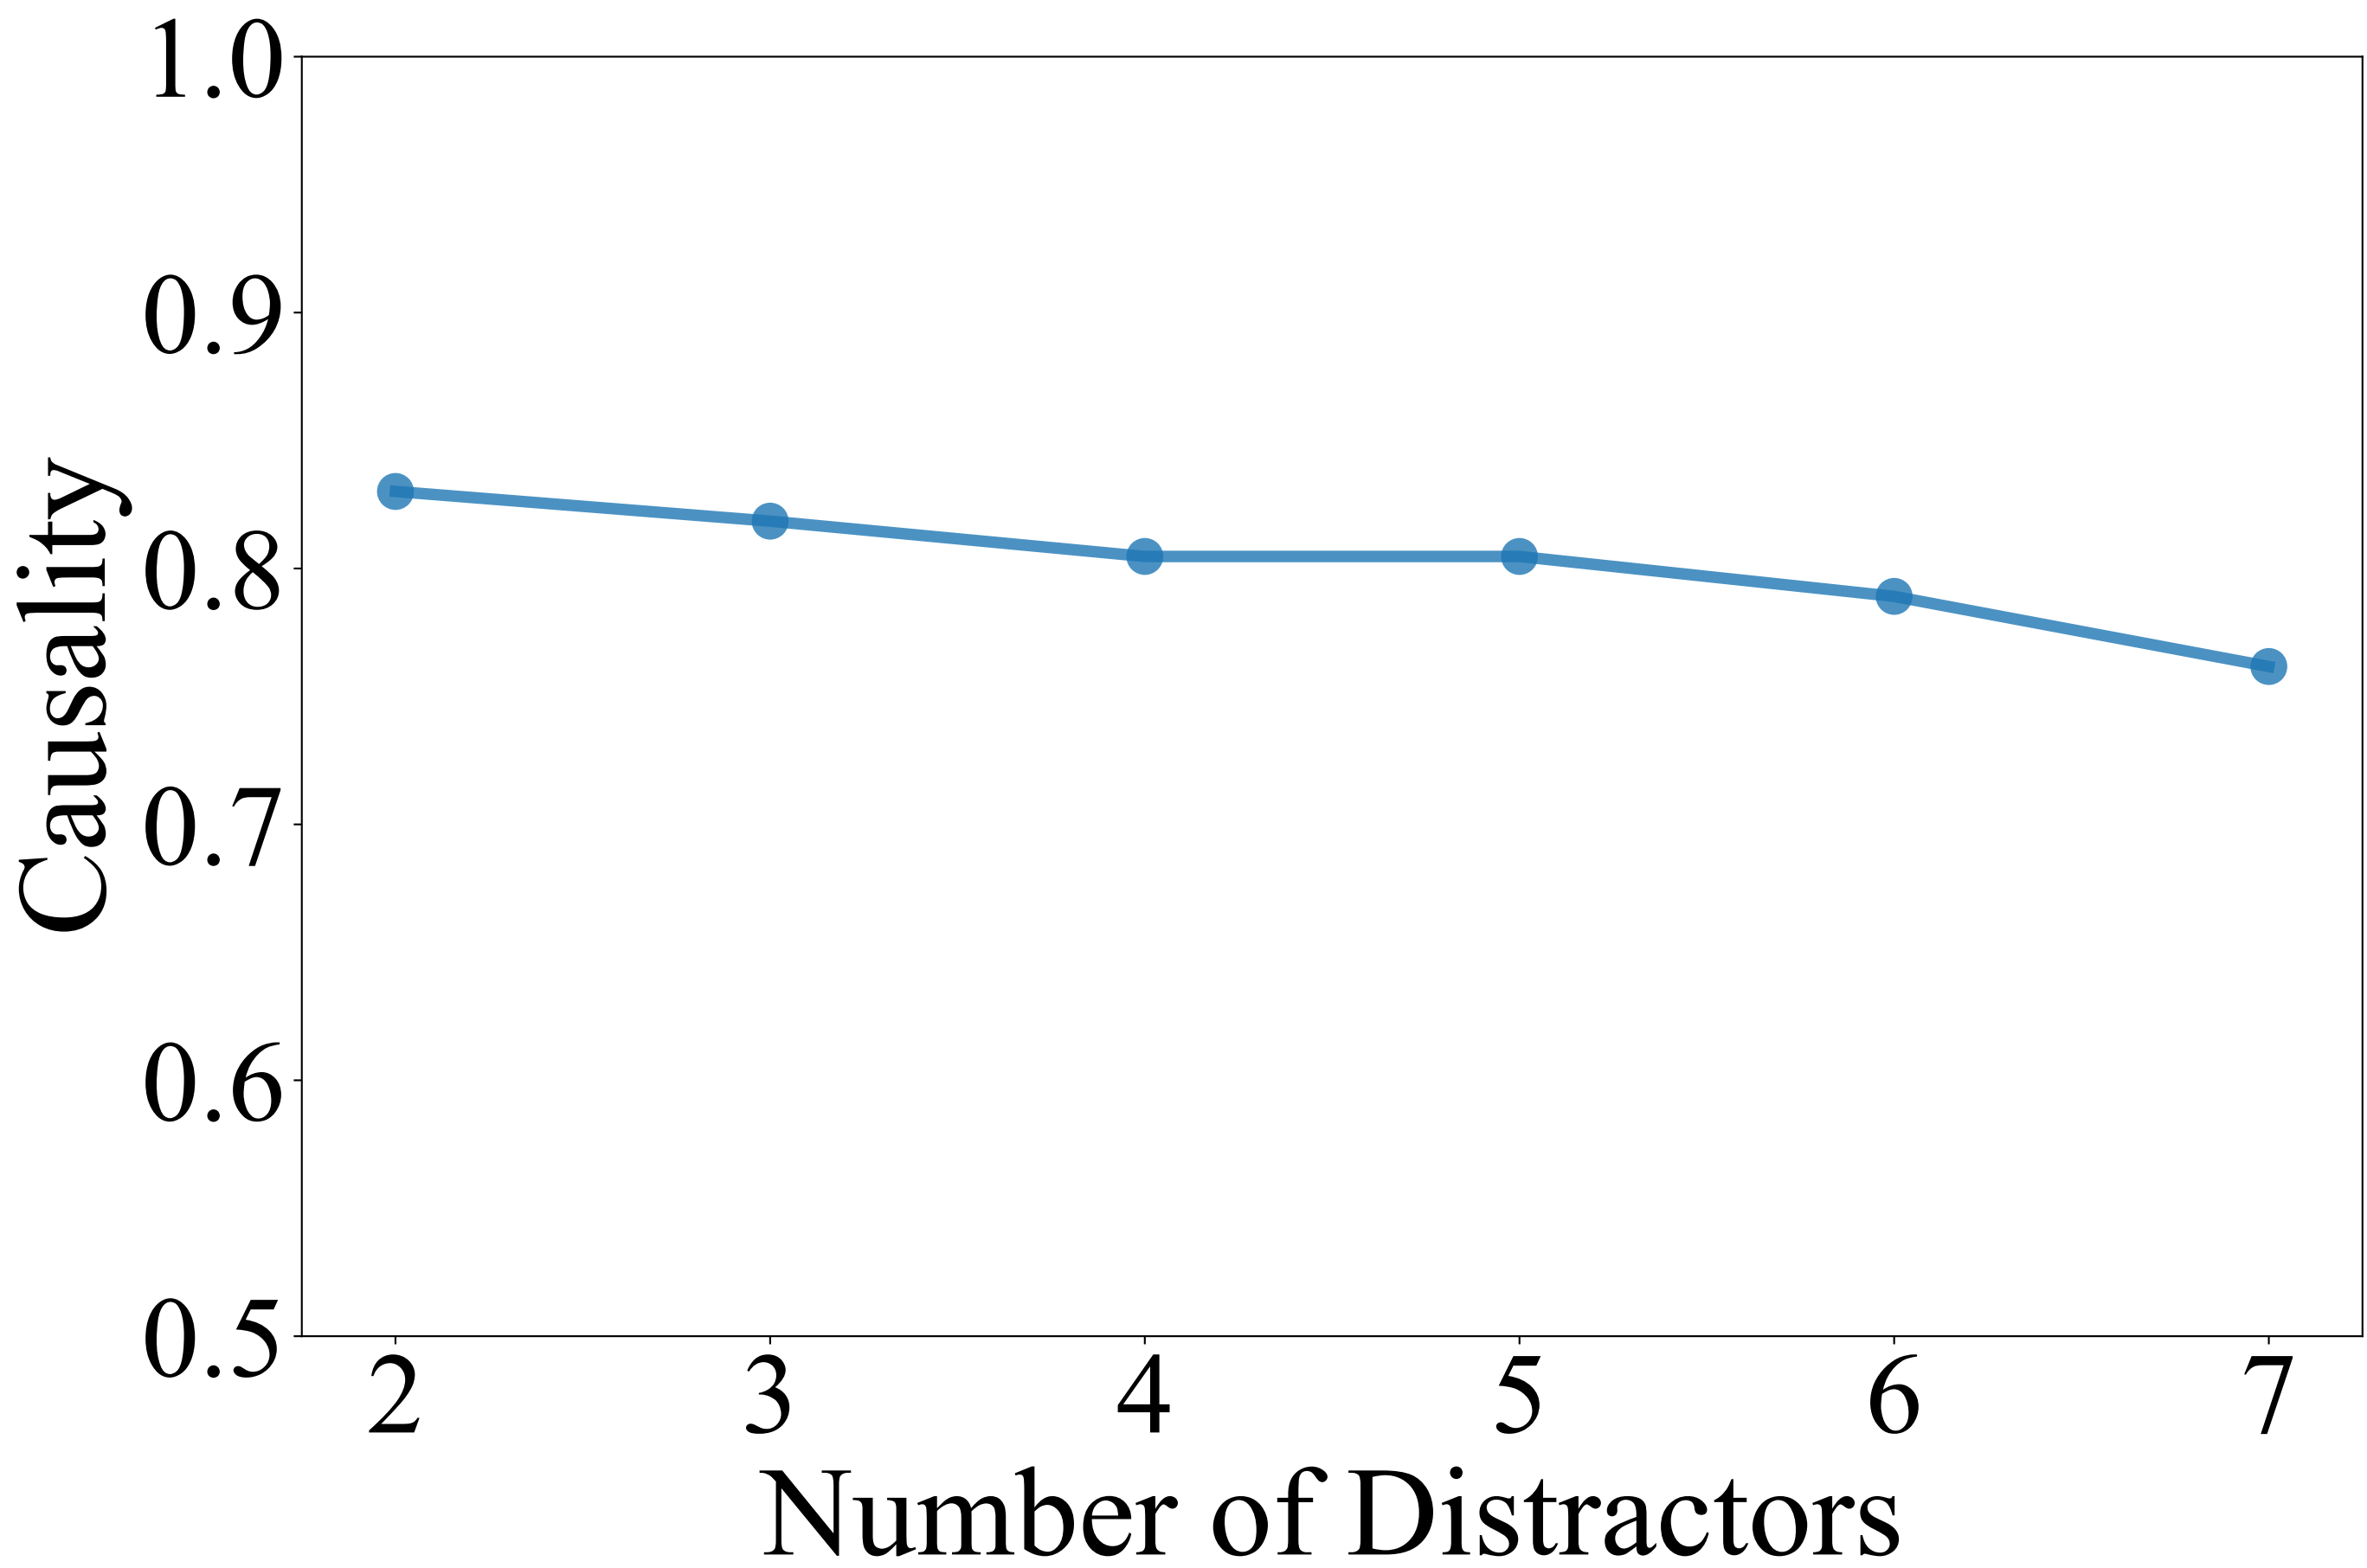

Supplement: supplementary_material [file causality_vs_n_distractors.pdf › filter/notebooks/figures/causality_vs_n_distractors.pdf]

residual\_2.pdf | gemma-2-27b-it

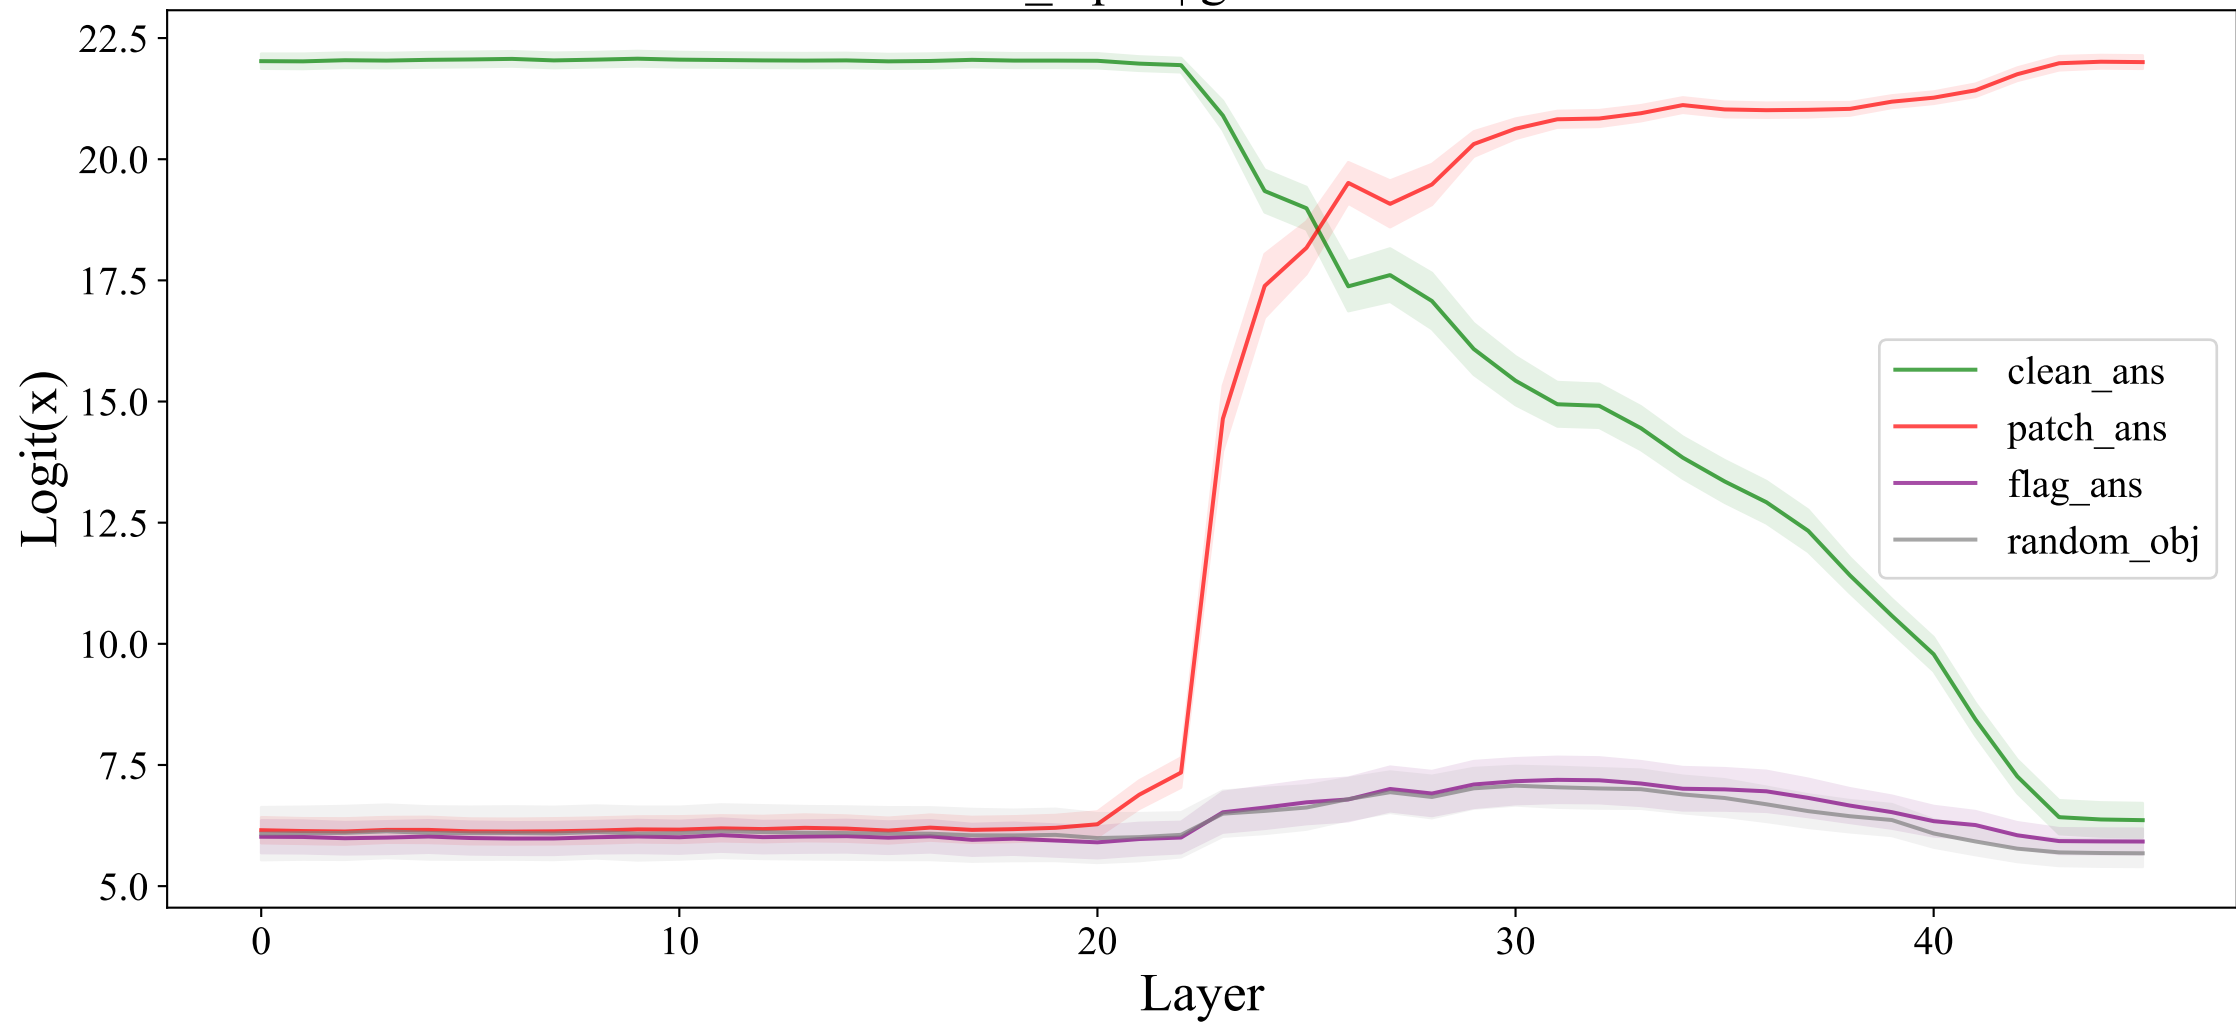

Supplement: supplementary_material [file residual_2.pdf › filter/notebooks/figures/gemma-2-27b-it/residual/residual_2.pdf]

residual\_2\_flag\_ablate.pdf | gemma-2-27b-it

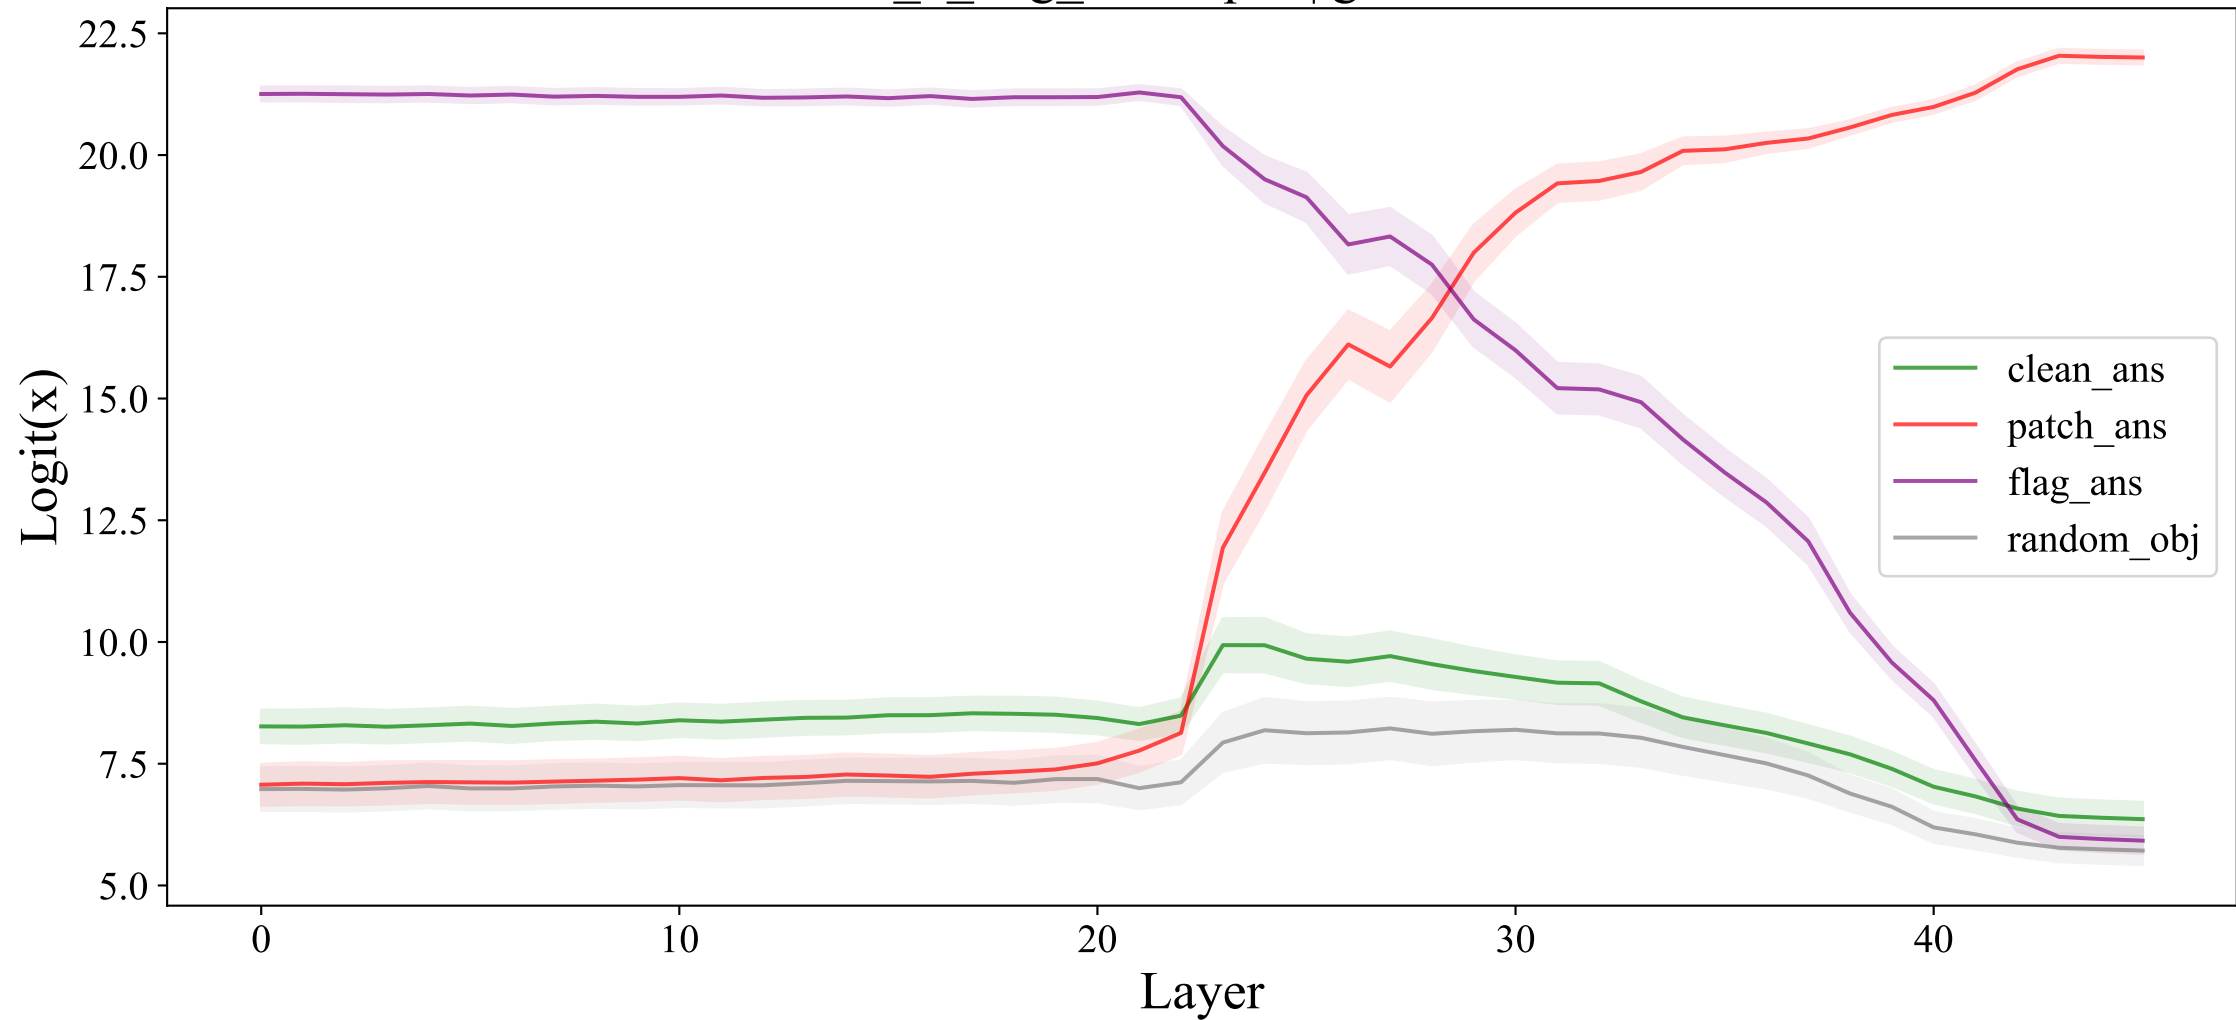

Supplement: supplementary_material [file residual_2_flag_ablate.pdf › filter/notebooks/figures/gemma-2-27b-it/residual/residual_2_flag_ablate.pdf]

residual\_3.pdf | gemma-2-27b-it

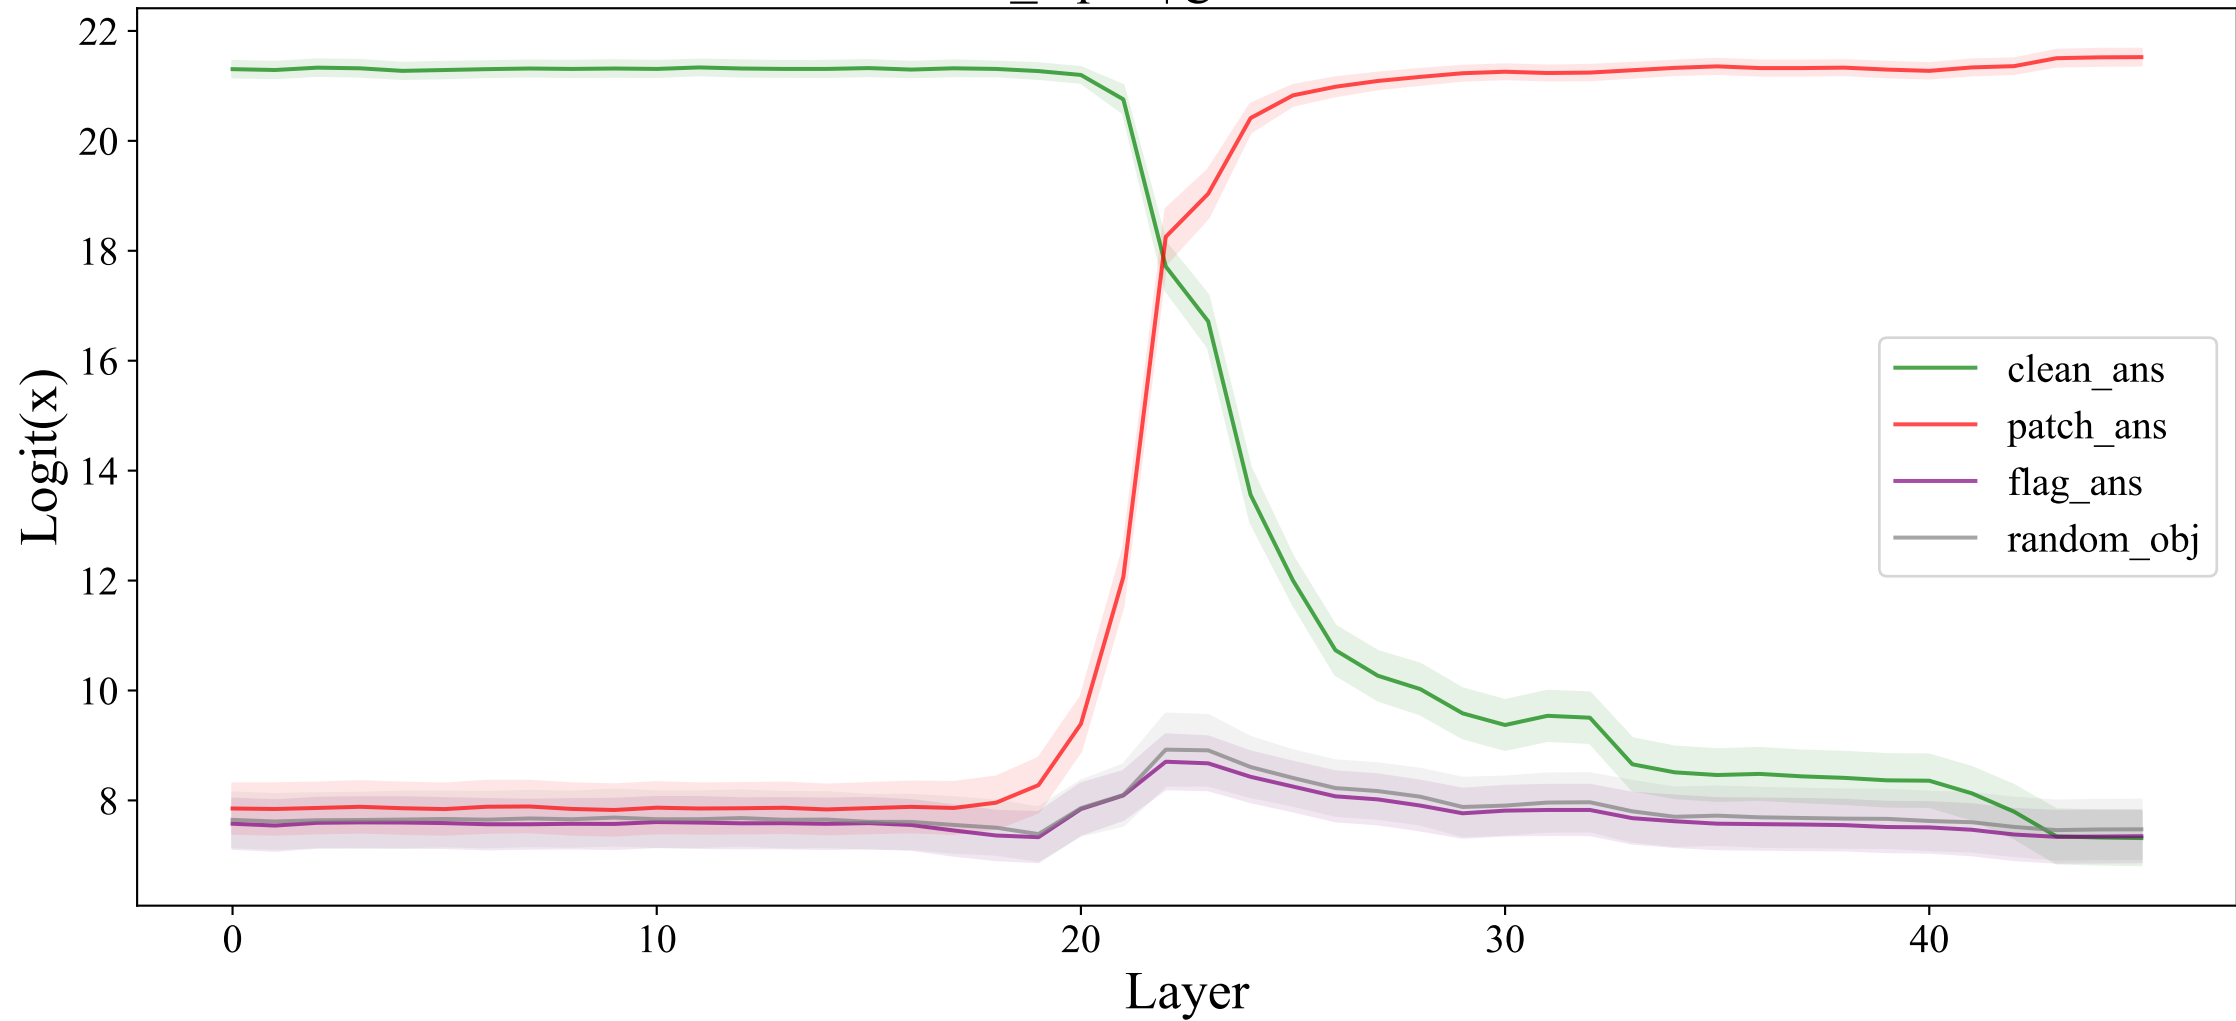

Supplement: supplementary_material [file residual_3.pdf › filter/notebooks/figures/gemma-2-27b-it/residual/residual_3.pdf]

residual\_3\_flag\_ablate.pdf | gemma-2-27b-it

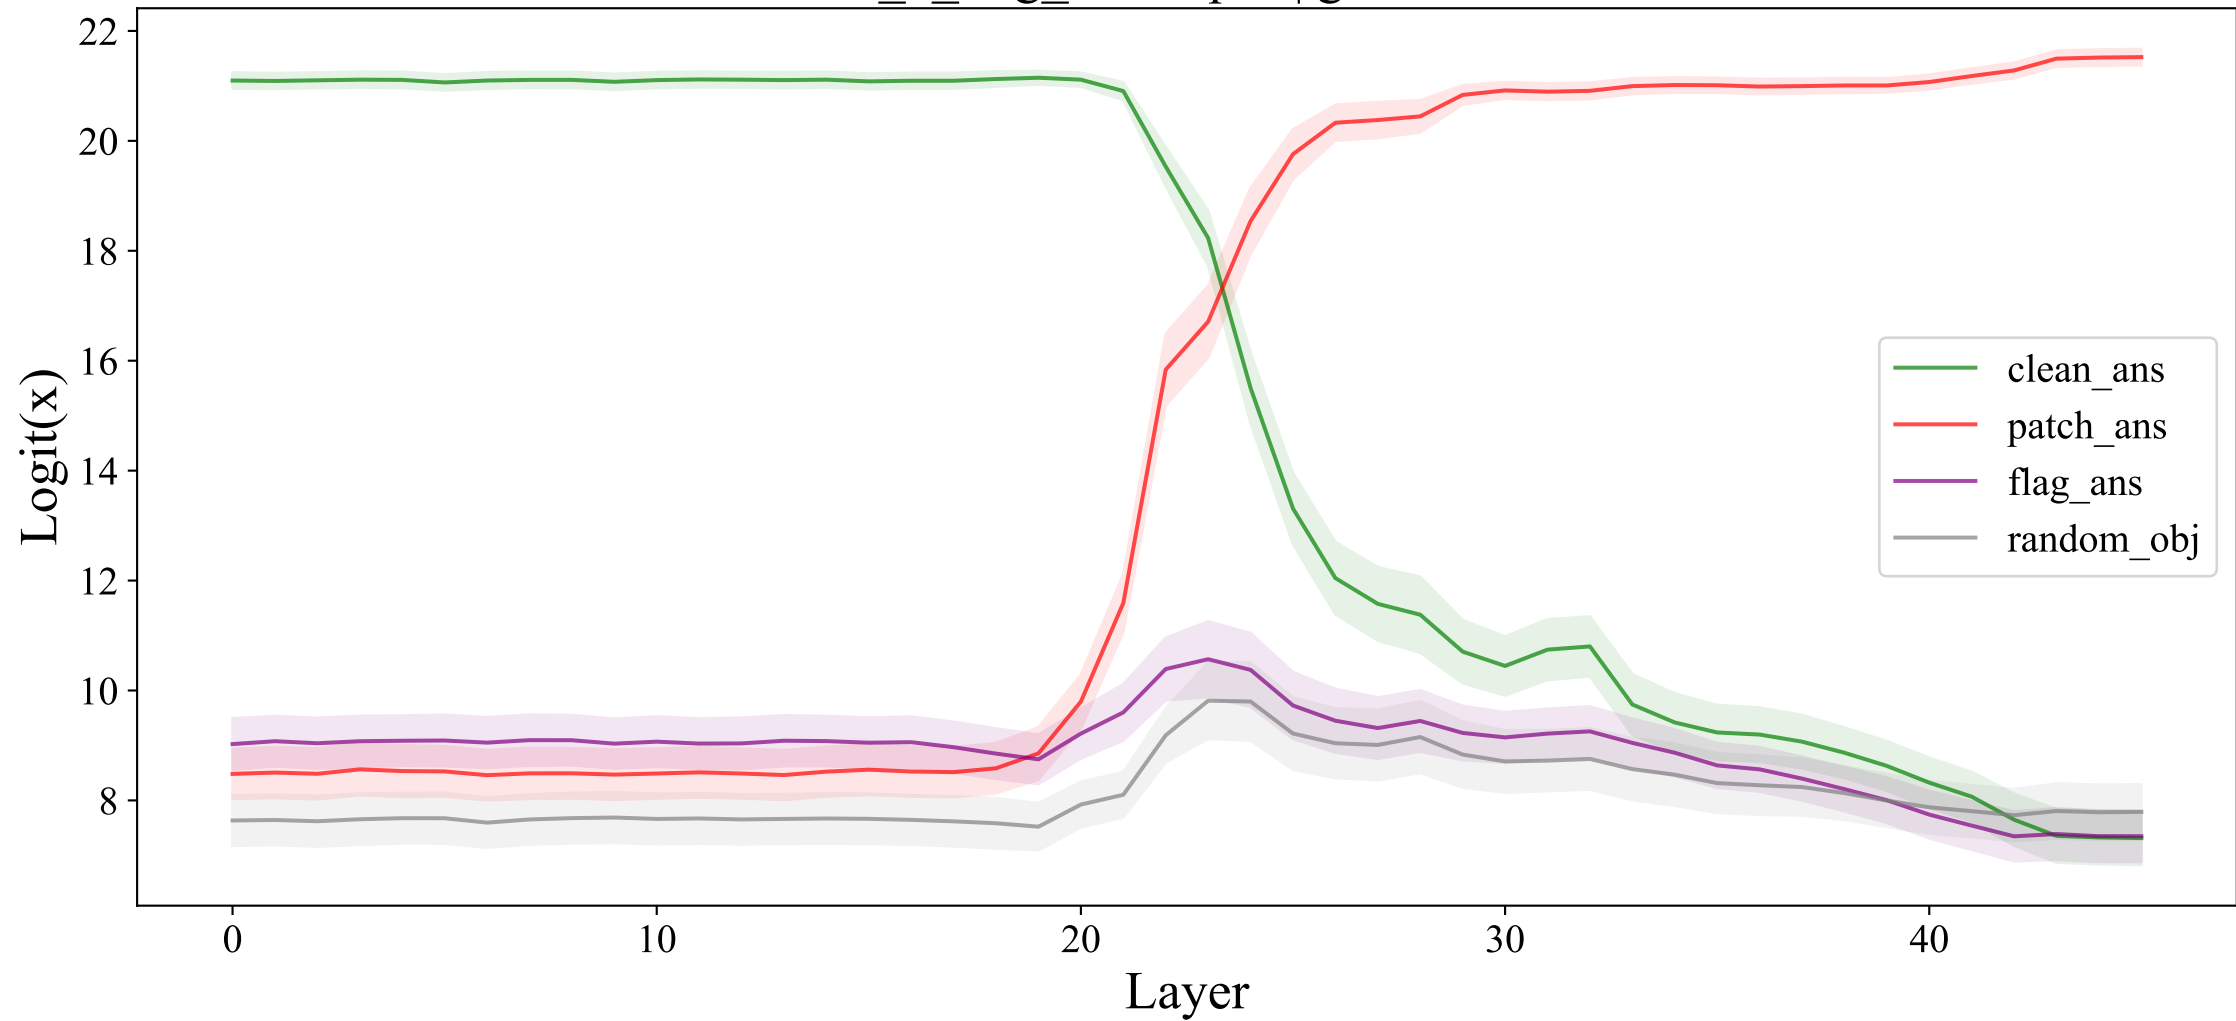

Supplement: supplementary_material [file residual_3_flag_ablate.pdf › filter/notebooks/figures/gemma-2-27b-it/residual/residual_3_flag_ablate.pdf]

Residual | gemma-2-27b-it

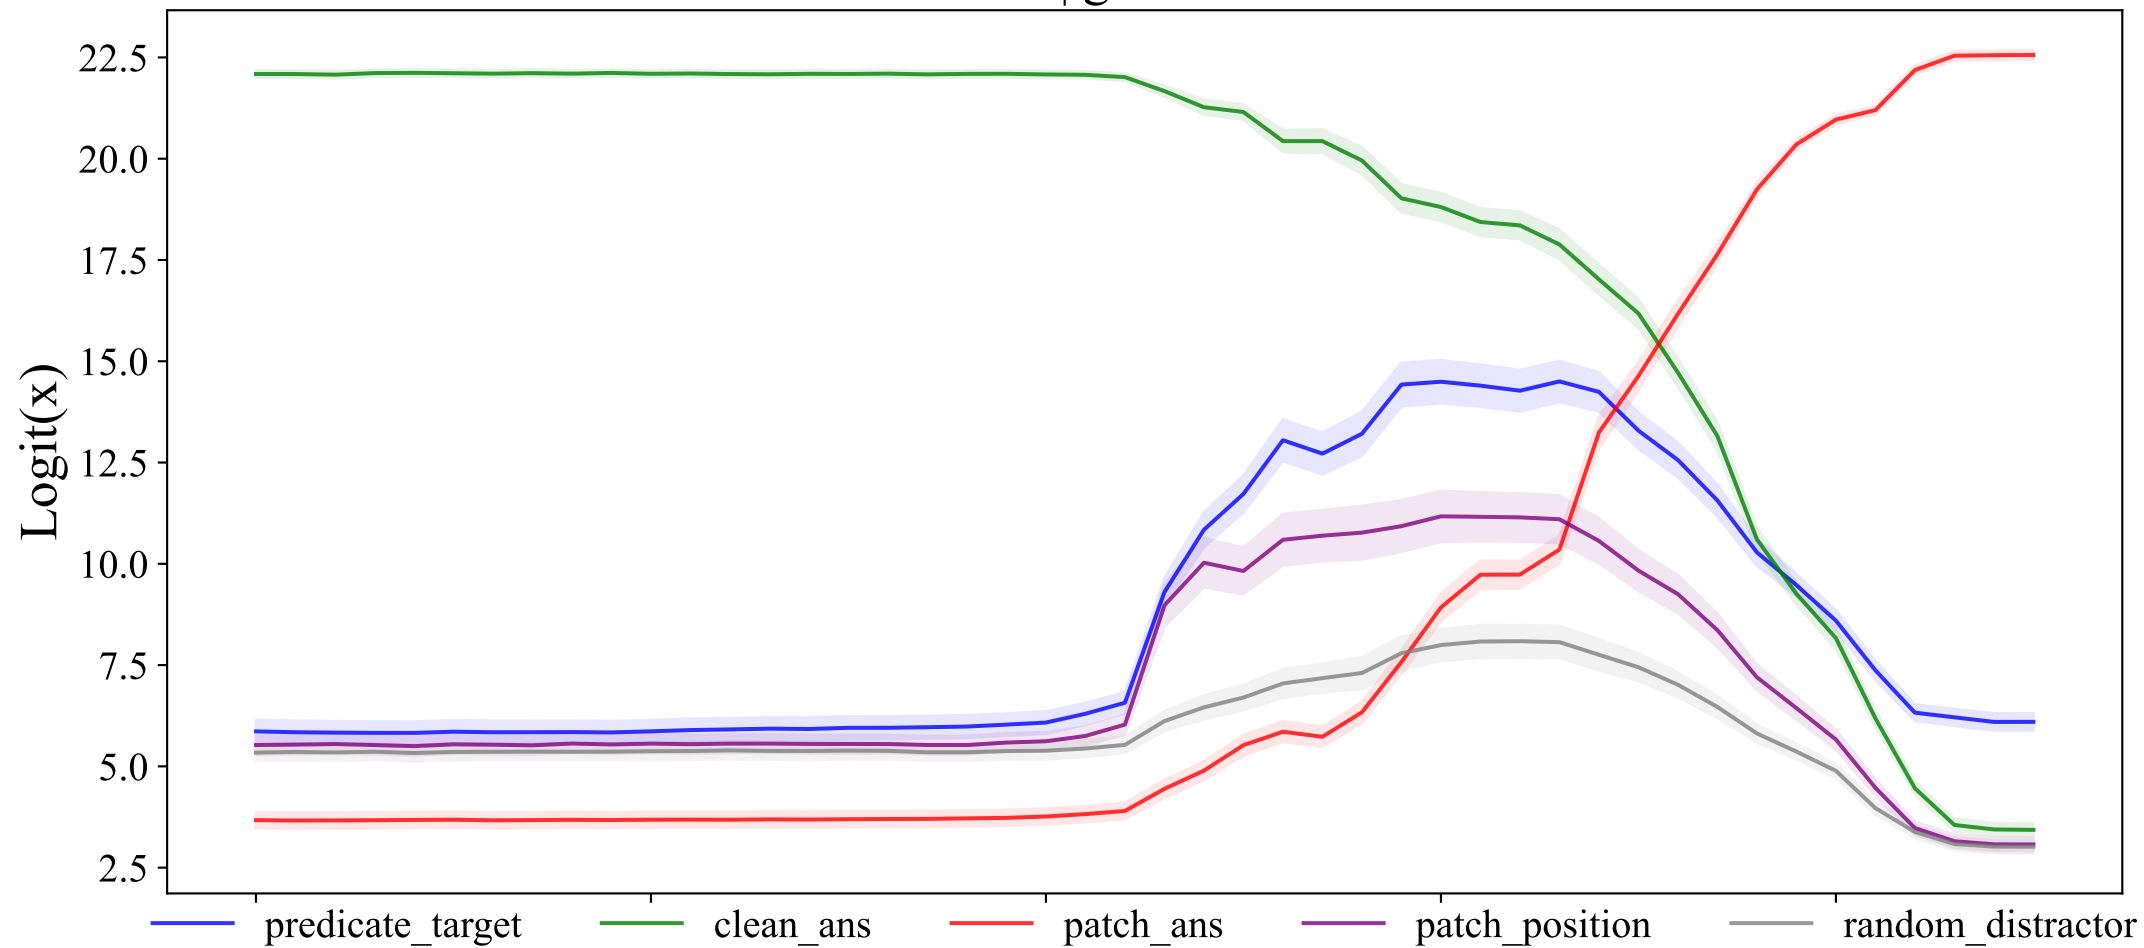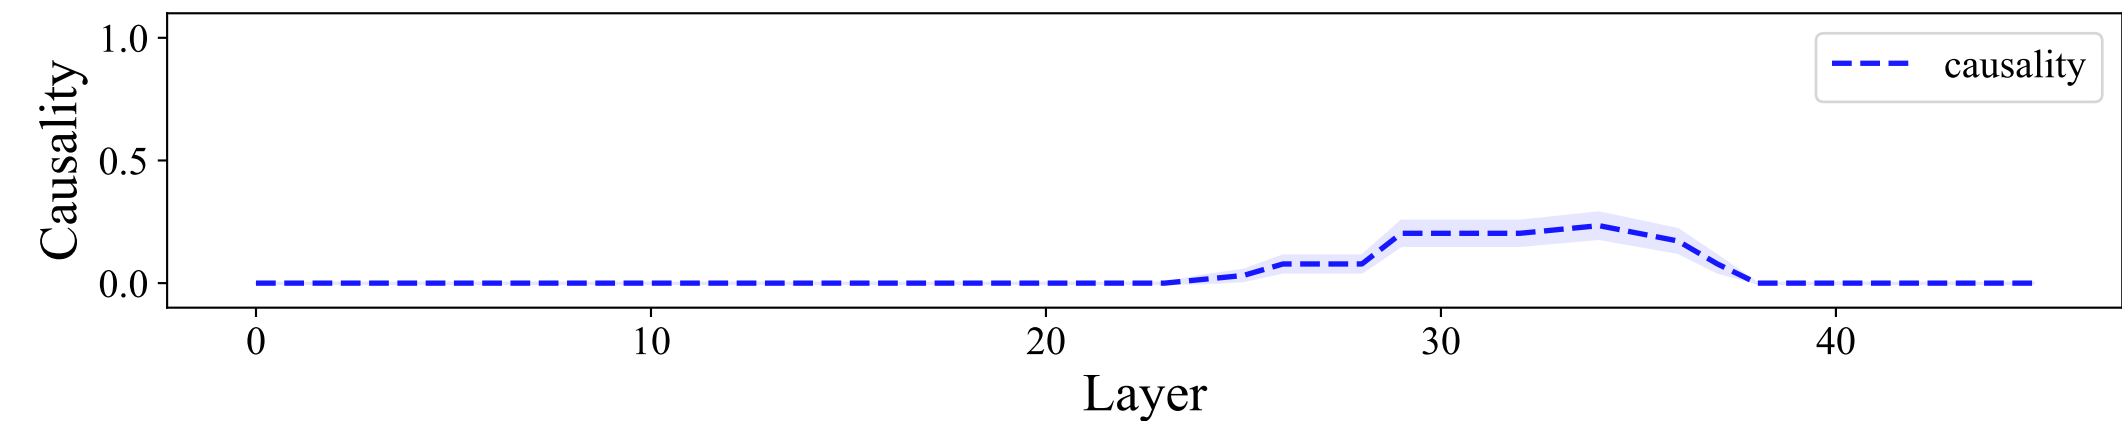

Supplement: supplementary_material [file template_2.pdf › filter/notebooks/figures/gemma-2-27b-it/residual/template_2.pdf]

Residual | gemma-2-27b-it

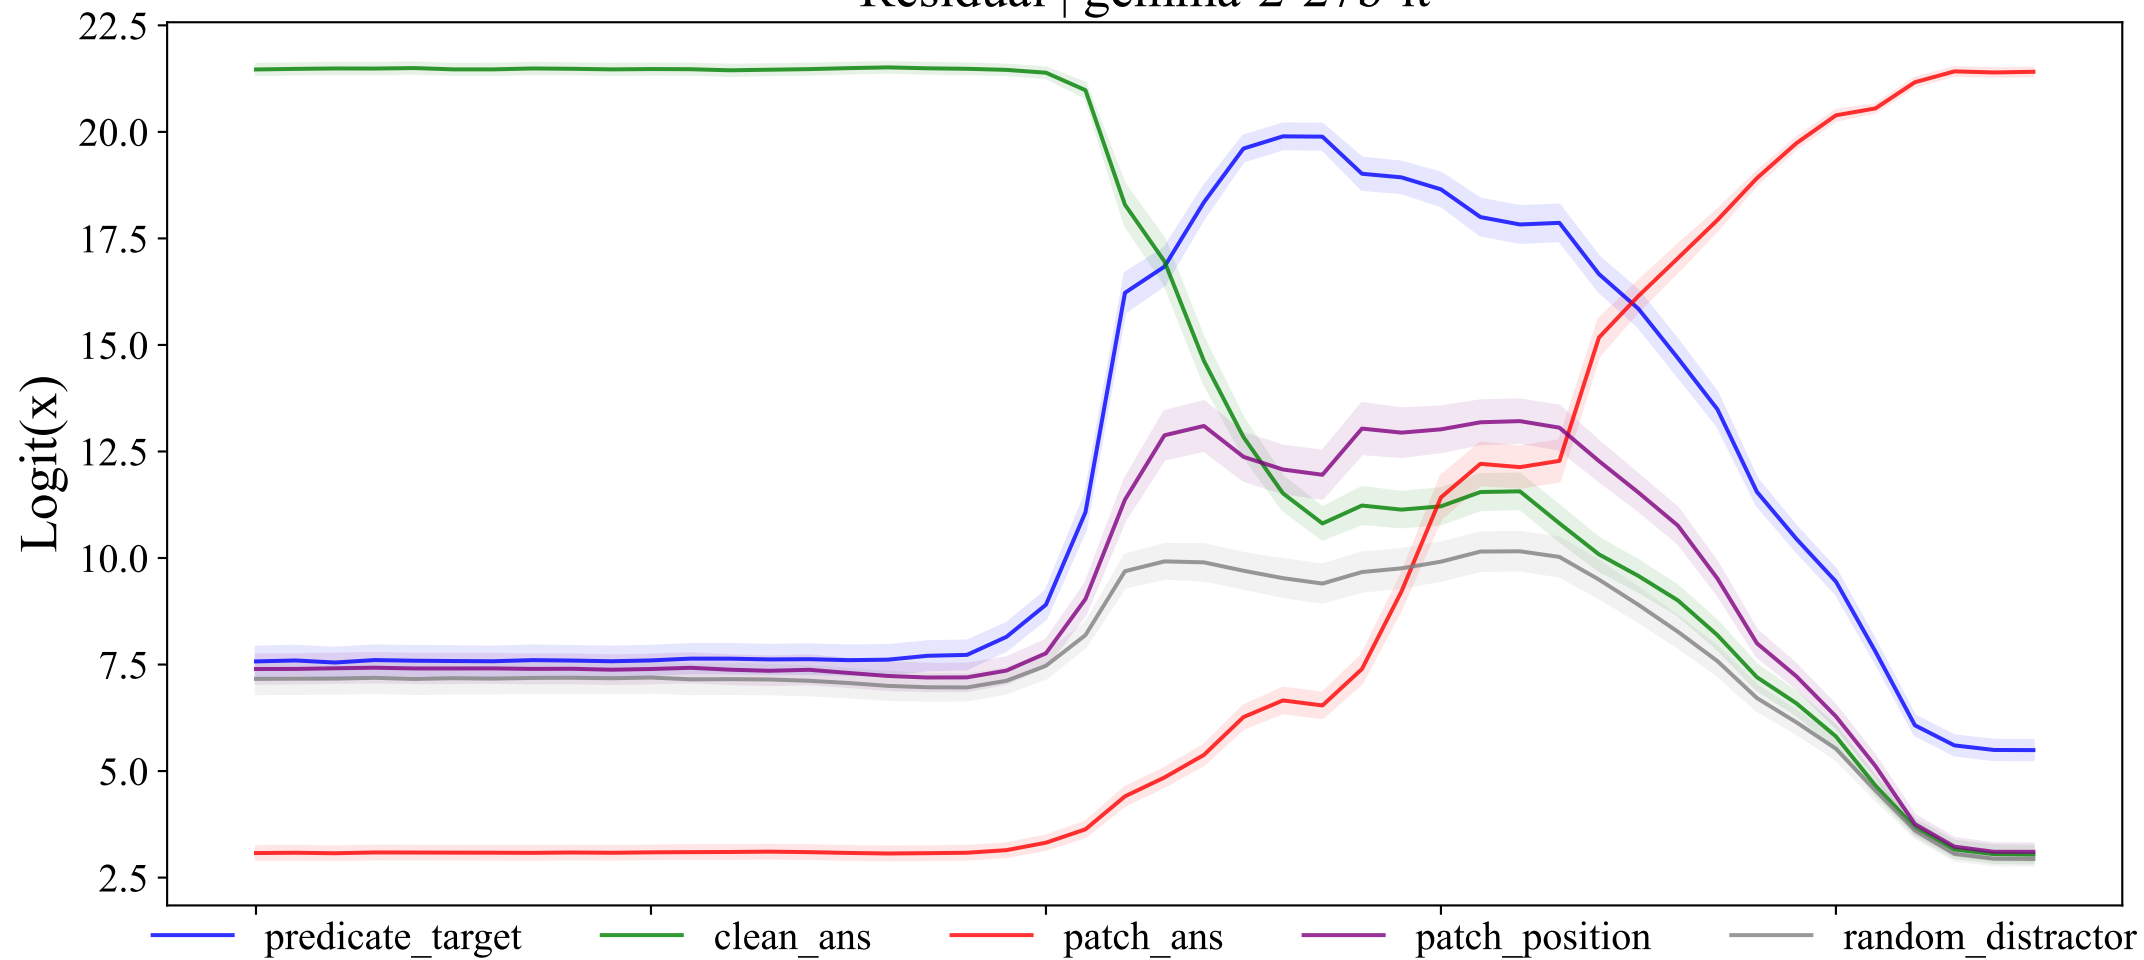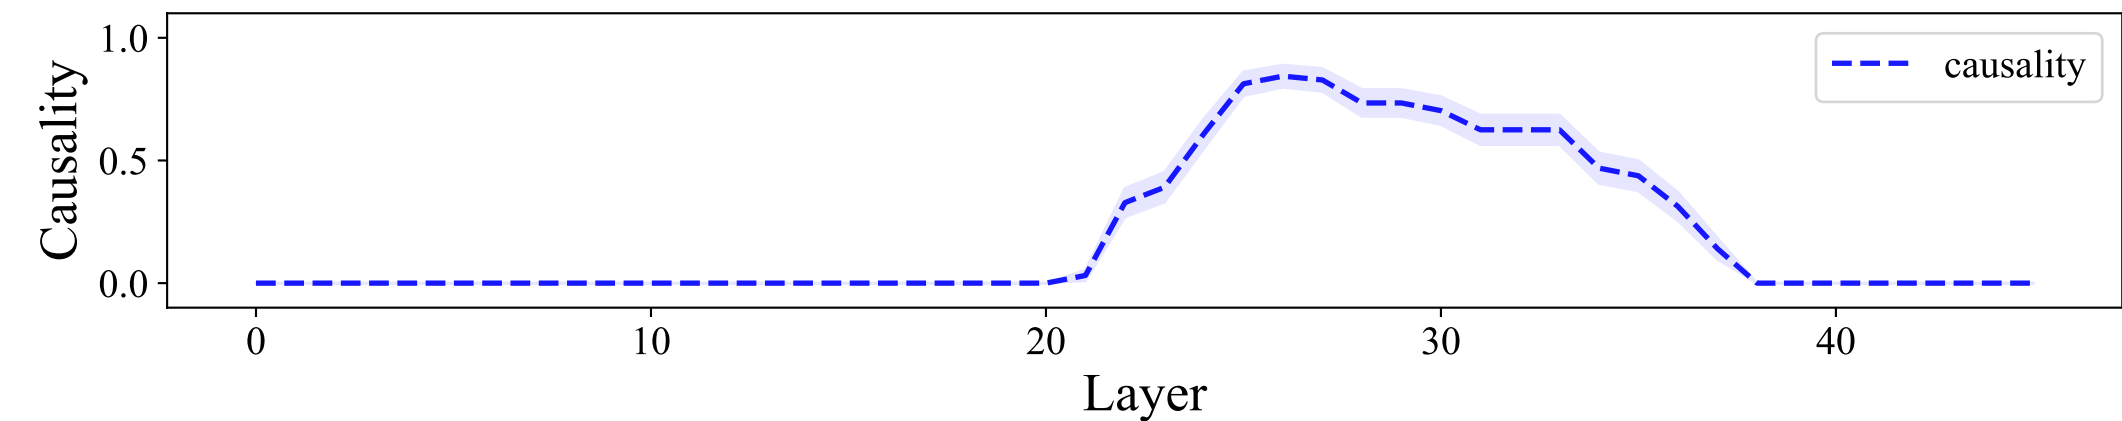

Supplement: supplementary_material [file template_3.pdf › filter/notebooks/figures/gemma-2-27b-it/residual/template_3.pdf]

Trained On

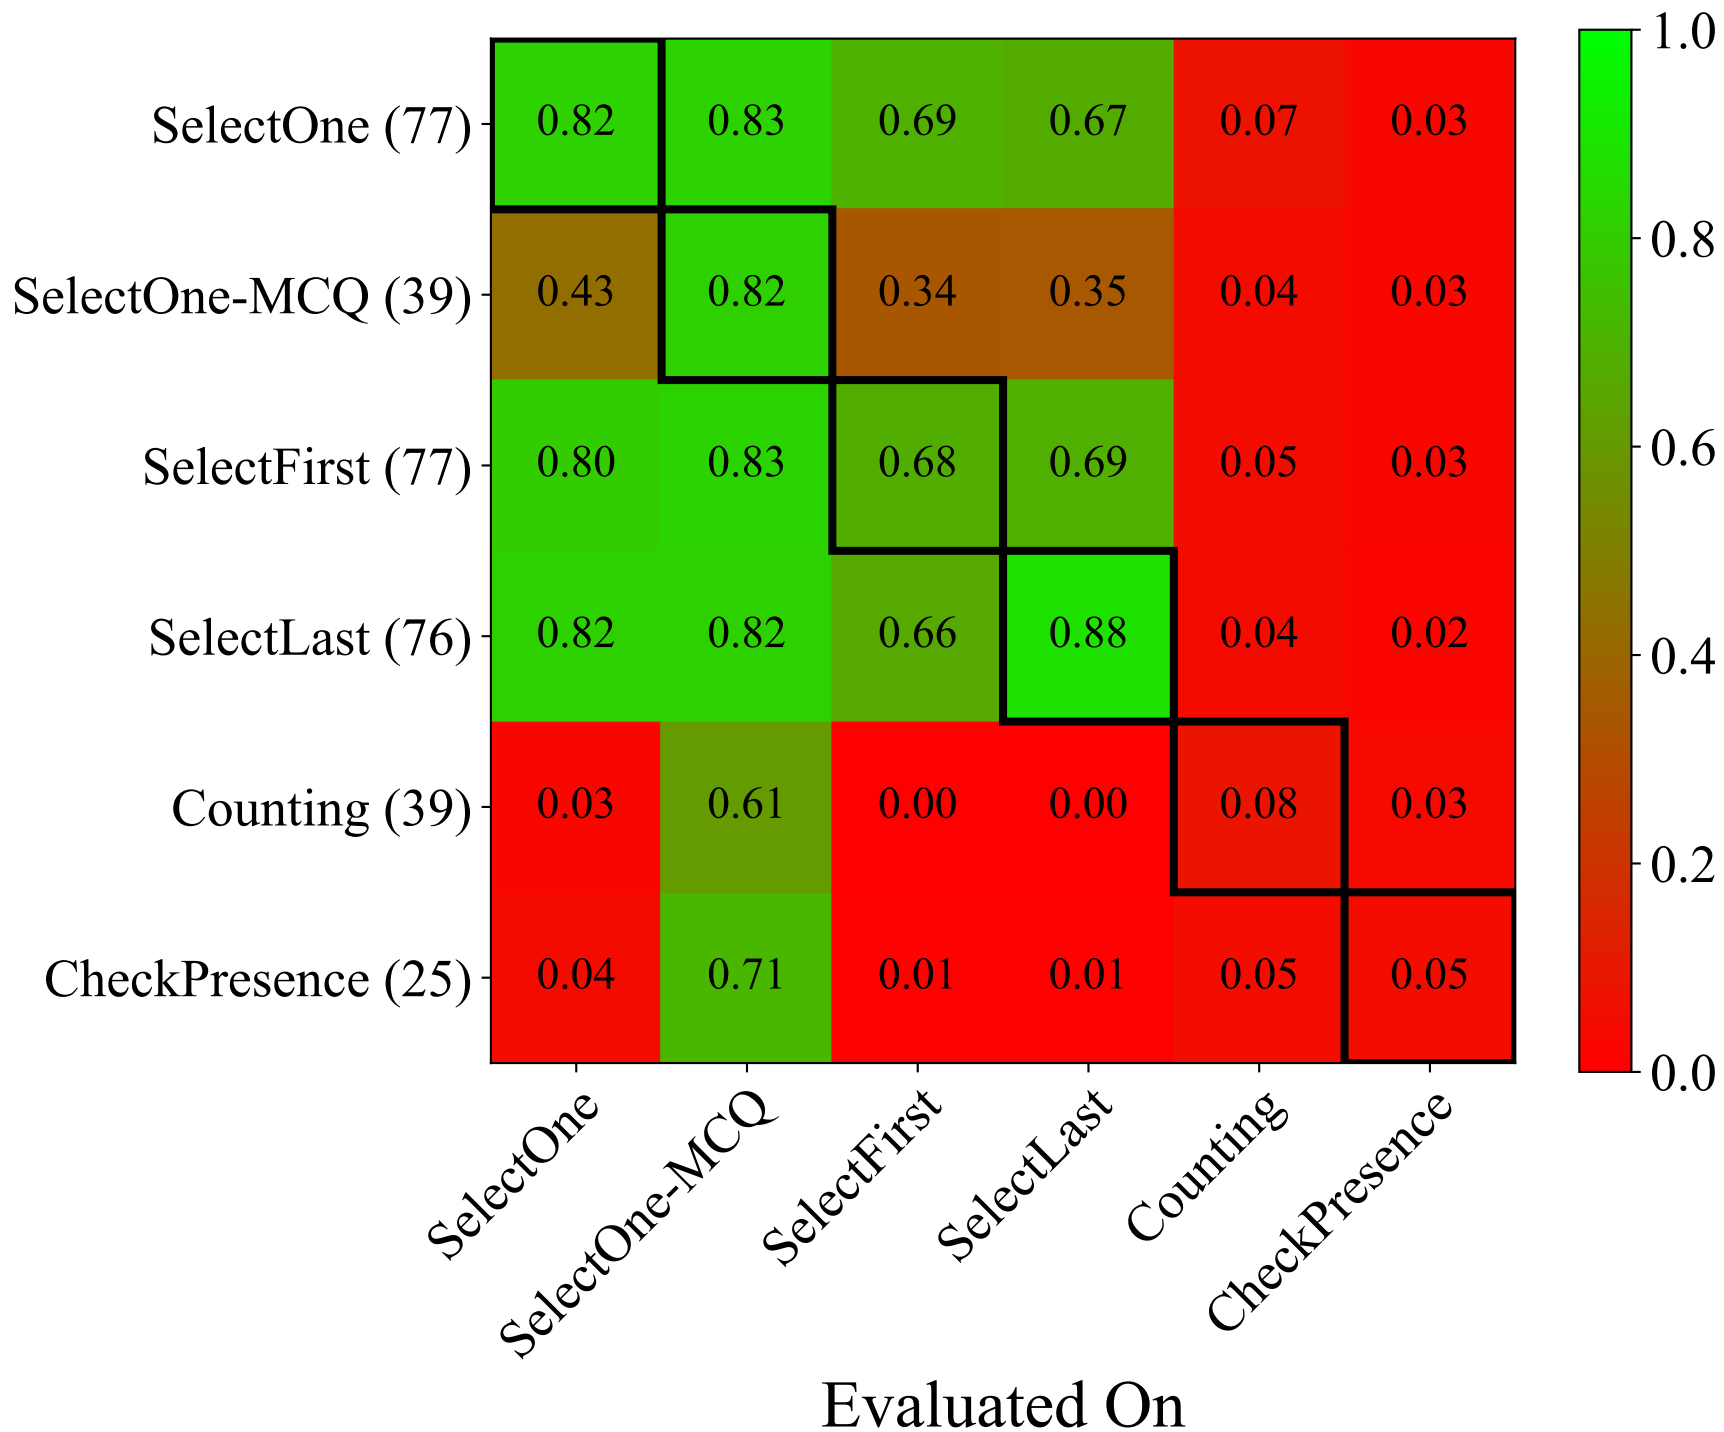

Supplement: supplementary_material [file gemma-head_transfer.pdf › filter/notebooks/figures/gemma-head_transfer.pdf]

Cached From

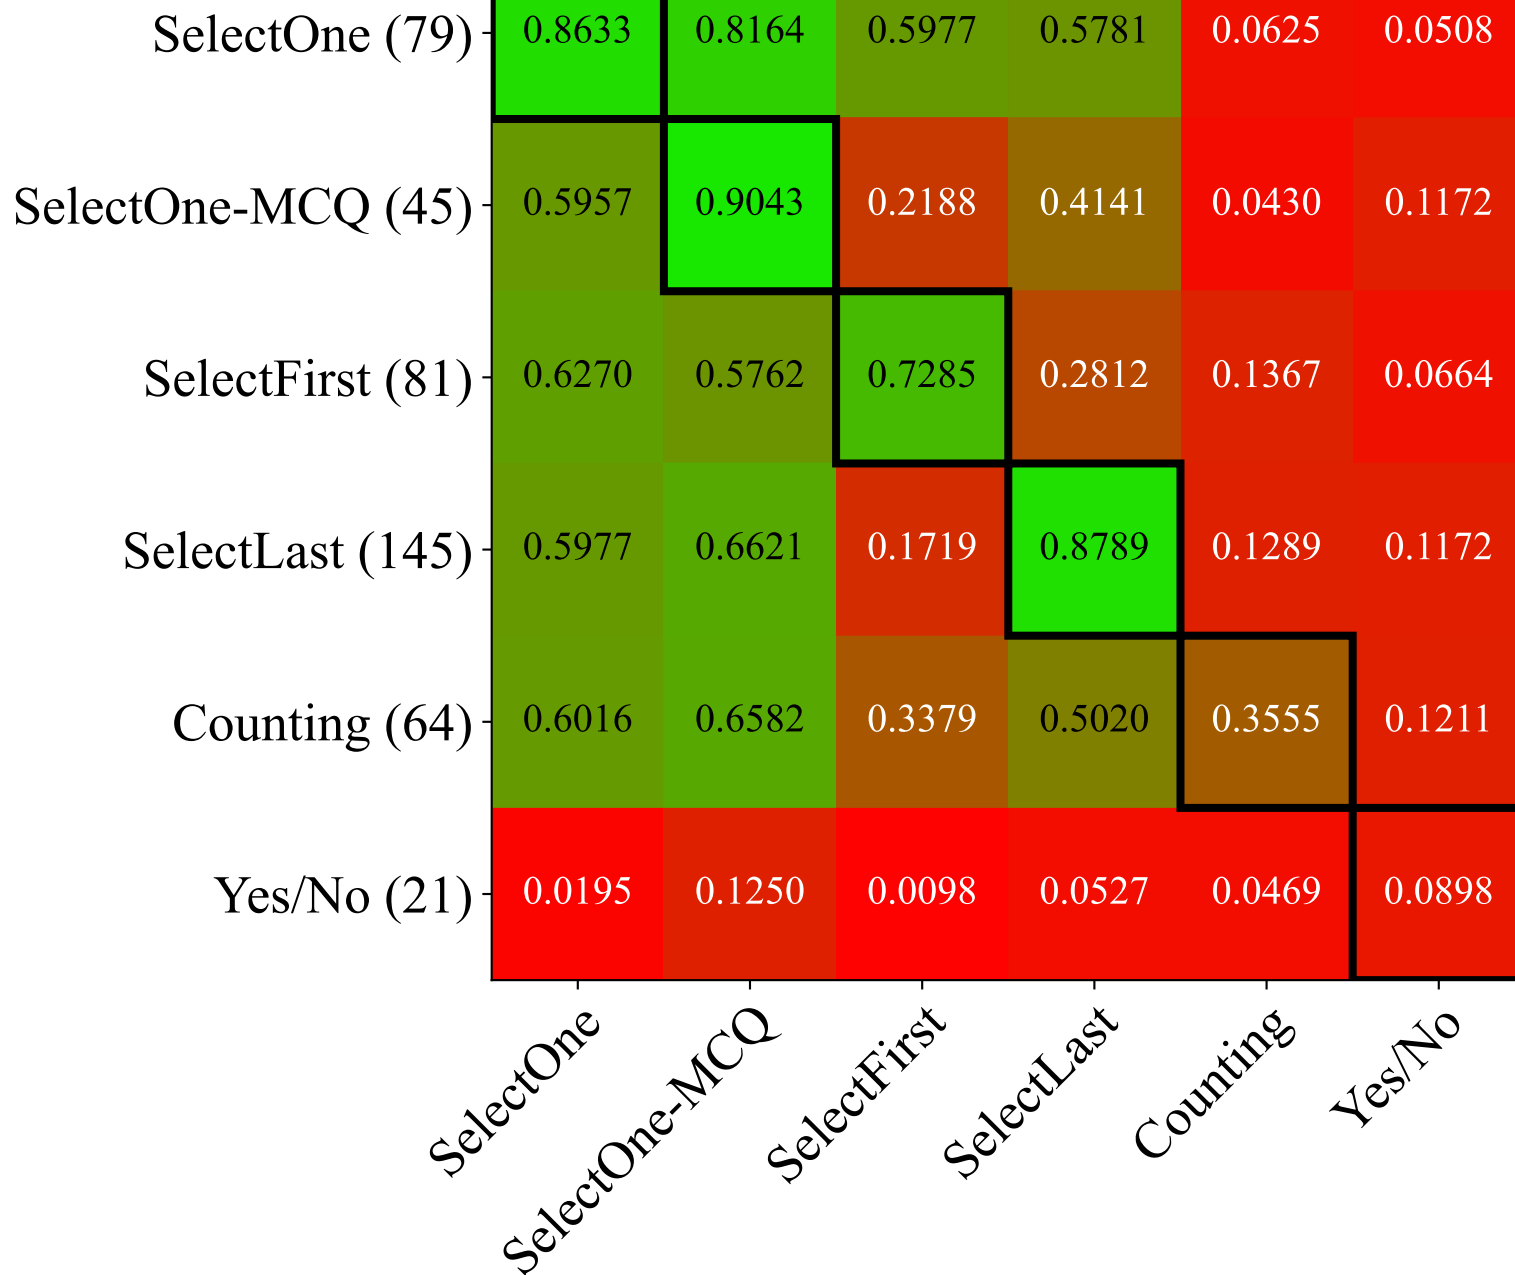

Causality Value

Supplement: supplementary_material [file head_level_transfer.pdf › filter/notebooks/figures/head_level_transfer.pdf]

Trained On

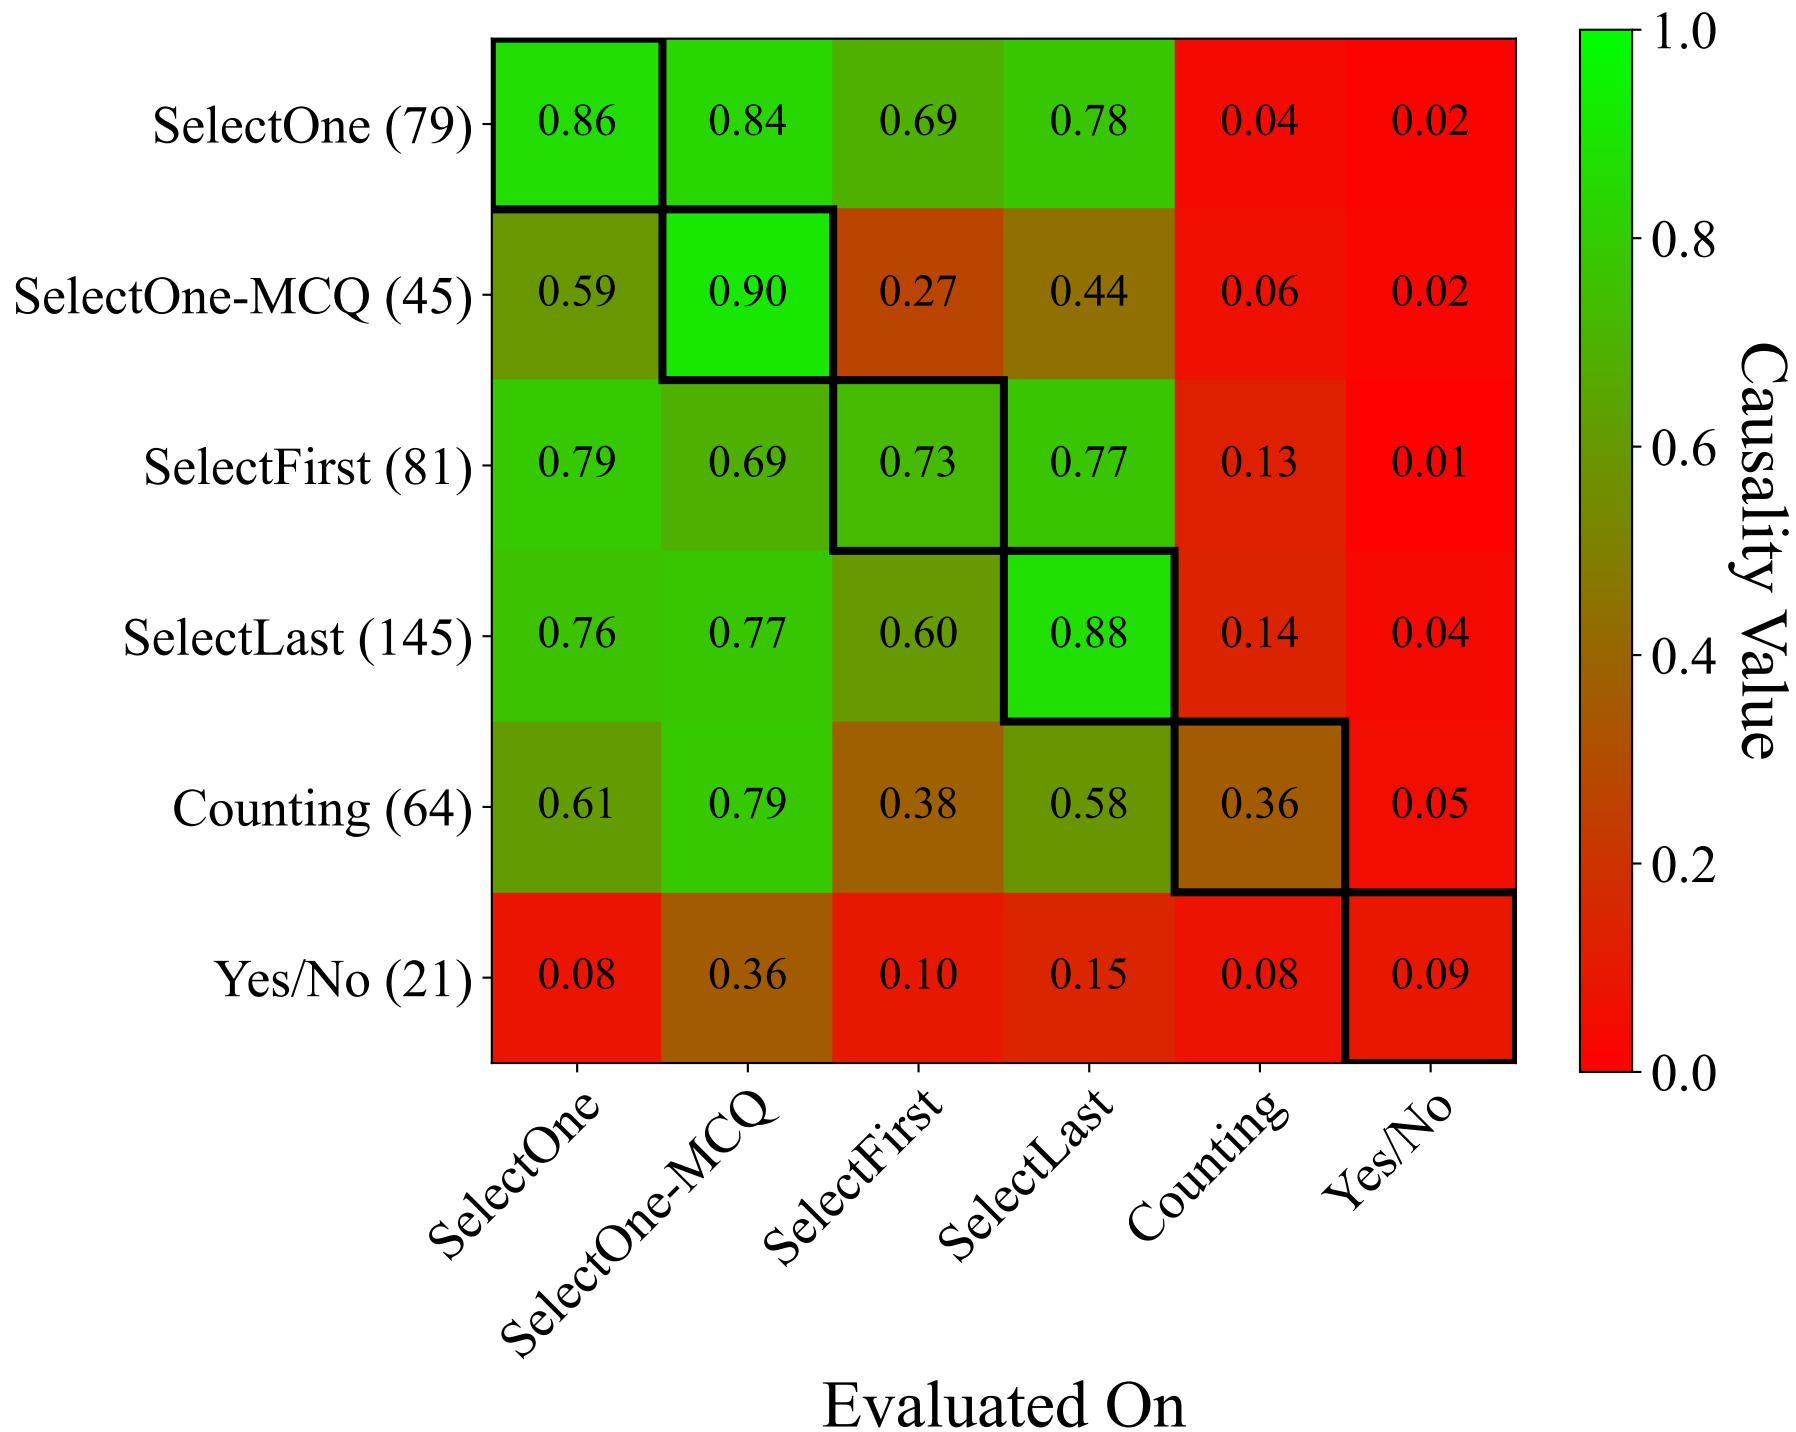

Supplement: supplementary_material [file head_transfer.pdf › filter/notebooks/figures/head_transfer.pdf]

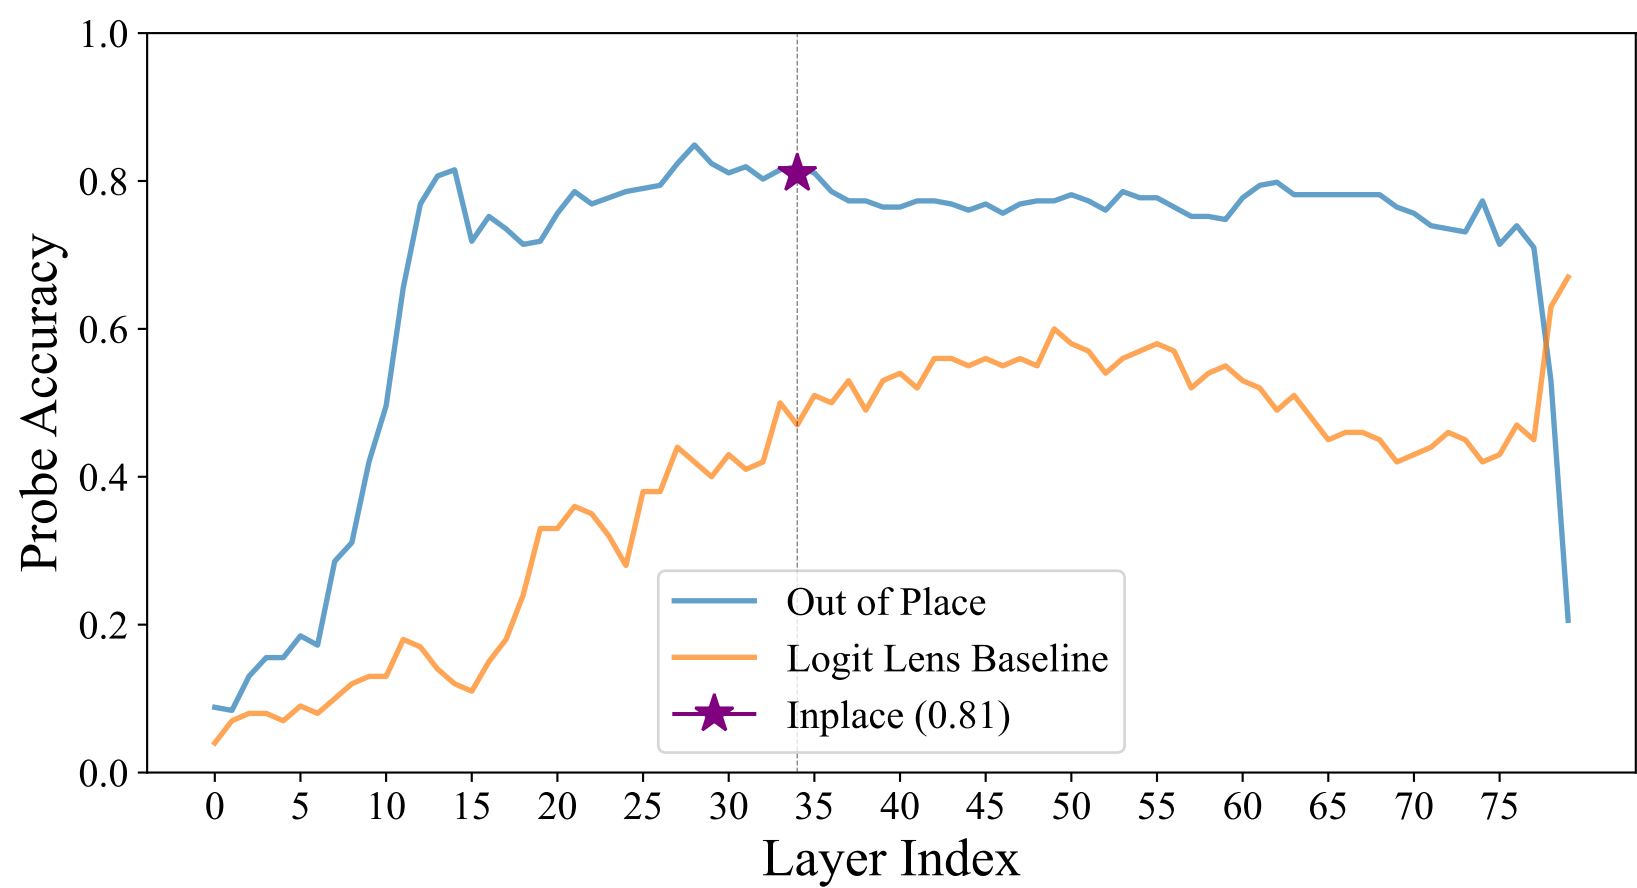

Supplement: supplementary_material [file probe_performance.pdf › filter/notebooks/figures/probe_performance.pdf]
